# Supplementary material for: 2-Deoxyribose-5-phosphate aldolase, a remarkably tolerant aldolase towards nucleophile substrates
Source: Royal Society of Chemistry journal article supplement (doi:10.1039/c9cc03361k), 2019-01-01
Supplement: c9cc03361k1.pdf [file c9cc03361k1.pdf]

SUPPLEMENTARY INFO

**2-Deoxyribose-5-phosphate Aldolase, a Remarkably Tolerant Aldolase  
Towards Nucleophile Substrate**

Table of contents

|       |                                                                                                                |    |
|-------|----------------------------------------------------------------------------------------------------------------|----|
| 1     | Material.....                                                                                                  | 2  |
| 2     | Methods.....                                                                                                   | 2  |
| 2.1   | DERA collection implementation.....                                                                            | 2  |
| 2.2   | DERA collection screening.....                                                                                 | 3  |
| 2.2.1 | Chromatography conditions.....                                                                                 | 3  |
| 2.2.2 | Mass spectrometry conditions.....                                                                              | 3  |
| 2.3   | DERA purification.....                                                                                         | 4  |
| 2.4   | DERA activity.....                                                                                             | 4  |
| 2.5   | L-G3P content.....                                                                                             | 4  |
| 2.6   | Analytical scale syntheses.....                                                                                | 4  |
| 2.7   | General protocol for the preparation of terminally phosphorylated monosaccharides.....                         | 6  |
| 2.7.1 | (2S,3S,4R)-2,3-dihydroxy-4-methyl-5-oxopentyl phosphate <b>11</b> (2-deoxy-2-methyl-L-xylose-5-phosphate)..... | 6  |
| 2.7.2 | (2S,3S)-2,3-dihydroxy-5-oxohexylphosphate <b>12</b> (1,3-dideoxy-L-sorbose-6-phosphate).....                   | 6  |
| 2.7.3 | (2S,3S)-2,3-dihydroxy-3-(2-oxocyclobutyl)propyl phosphate <b>13</b> .....                                      | 6  |
| 2.7.4 | (2S,3S)-2,3-dihydroxy-3-(2-oxocyclopentyl)propyl phosphate <b>14</b> .....                                     | 6  |
| 2.7.5 | (2S,3R,4R)-2,3,4-trihydroxy-5-oxopentyl phosphate <b>15</b> (L-lyxose-5-phosphate).....                        | 6  |
| 2.7.6 | (2S,3R,4R)-2,3,4,6-tetrahydroxy-5-oxohexyl phosphate <b>16</b> (L-tagatose-6-phosphate).....                   | 6  |
| 2.8   | Characterization of the aldols.....                                                                            | 6  |
| 2.8.1 | (2S,3S,4R)-2,3-dihydroxy-4-methyl-5-oxopentyl phosphate <b>11</b> (2-deoxy-2-methyl-L-xylose-5-phosphate)..... | 7  |
| 2.8.2 | (2S,3S)-2,3-dihydroxy-5-oxohexylphosphate <b>12</b> (1,3-dideoxy-L-sorbose-6-phosphate).....                   | 9  |
| 2.8.3 | (2S,3S)-2,3-dihydroxy-3-(2-oxocyclobutyl)propyl phosphate <b>13</b> .....                                      | 10 |
| 2.8.4 | (2S,3S)-2,3-dihydroxy-3-(2-oxocyclopentyl)propyl phosphate <b>14</b> .....                                     | 13 |
| 2.8.5 | (2S,3R,4R)-2,3,4-trihydroxy-5-oxopentyl phosphate <b>15</b> (L-lyxose-5-phosphate).....                        | 14 |
| 2.8.6 | (2S,3R,4R)-2,3,4,6-tetrahydroxy-5-oxohexyl phosphate <b>16</b> (L-tagatose-6-phosphate).....                   | 16 |

## 1 Material

Acetone, dihydroxyacetone, propanone, butanone, cyclopentanone, propanal, hydroxypropanal and ethanal were purchased from Sigma-Aldrich. D,L-glyceraldehyde-3-phosphate diethyl acetal barium salt was from Sigma-Aldrich. All the enzymes required namely  $\alpha$ -glycerophosphate dehydrogenase from rabbit muscle, triosephosphate isomerase from rabbit muscle, pyruvate kinase from rabbit muscle, lactic dehydrogenase from rabbit muscle, glycerokinase from *Cellulomonas sp.* and phosphatase acid from potato were purchased from Sigma-Aldrich. L-G3P reductase was produced as previously reported, without the lyophilisation step.<sup>1</sup> L-G3P was prepared as already published and purified by barium salt precipitation.<sup>2</sup>

## 2 Methods

### 2.1 DERA collection implementation

A sequence driven approach<sup>3</sup> have been applied using DERA related to a publication, as references (Table S1 below). Notably, 4 enzymes ORFAN of genes in the publication of Valino group<sup>4</sup> were included after a search of the corresponding DERAs sequences into strain genomes using MicroScope/MaGe platform (<http://www.genoscope.cns.fr/agc/microscope/mage/>). From 4654 proteins retrieved from UniprotKB, the clustering at 80% of identity allowed to select 411 enzymes representative of the biodiversity of this family. Primers were chosen for the corresponding genes. Genes were cloned in a pET22b(+) (Novagen) modified for ligation independent cloning as already described<sup>3</sup>. All primers and strains of the genes for which activity could be significantly measured by LCMS (see 2.2), are listed in Table S1. All the strains along with their identifiers were purchased from DSMZ collection. When DNA samples corresponding to the gene encoding the selected enzyme was not available, PCR was performed on the DNA of another strain from the same species as noted in Table S1. The genes corresponding to the selected DERA were recloned with a six histidine tag in N terminal position. Each expression plasmid was transformed into *E. coli* BL21-CodonPlus (DE3)-RIPL. Cell culture, induction of protein production, and cell lysis were conducted as previously published in 96-well microplates<sup>3</sup>. Protein over-expression was evaluated by SDS-PAGE analysis using the NuPAGE system (Invitrogen). Protein concentration was determined by the Bradford method, with bovine serum albumin as the standard (Bio-Rad).

| Entry  | Organism                                   | References                                  |
|--------|--------------------------------------------|---------------------------------------------|
| Q8ZJV8 | <i>Salmonella typhimurium</i>              | Hoffee et al., 1974; Jargiello et al., 1976 |
| Q73A11 | <i>Bacillus cereus</i>                     | Sgarrella et al., 1992                      |
| P0A6L0 | <i>Escherichia coli</i>                    | Gijsen et al., 1994                         |
| Q9Y948 | <i>Aeropyrum pernix</i>                    | Sakuraba et al., 2003                       |
| Q73A11 | <i>Bacillus cereus</i>                     | Han et al., 2004                            |
| Q9AIP7 | <i>Streptococcus mutans</i>                | Han et al., 2004                            |
| Q5SJ28 | <i>Thermus thermophilus</i>                | Lokanath et al., 2004                       |
| Q87710 | <i>Thermococcus kodakarensis</i>           | Rashid et al., 2004                         |
| Q8ZXK7 | <i>Pyrobaculum aerophilum</i>              | Sakuraba et al., 2007                       |
| Q9X1P5 | <i>Thermotoga maritima</i>                 | Sakuraba et al., 2007                       |
| C0LSK9 | <i>Yersinia sp. EA015</i>                  | Kim YM et al., 2009                         |
| C7E719 | <i>Paenibacillus sp. EA001</i>             | Kim YM et al., 2010                         |
| A2BLE9 | <i>Hyperthermus butylicus</i>              | Pei et al., 2010                            |
| B5IEU6 | <i>Aciduliprofundum boonei</i>             | Xiaopu Yin et al., 2011                     |
| B6YUB3 | <i>Thermococcus onnurineus</i>             | Xiaopu Yin et al., 2011                     |
| C3JIL6 | <i>Rhodococcus erythropolis</i>            | Kullartz & Pietruszka, 2012                 |
| Q88Z64 | <i>Lactobacillus plantarum</i>             | ORFAN extrapolated from Valino et al., 2012 |
| Q6D992 | <i>Pectobacterium atrosepticum</i>         | ORFAN extrapolated from Valino et al., 2012 |
| F8K193 | <i>Streptomyces cattleya</i>               | ORFAN extrapolated from Valino et al., 2012 |
| B1W2U4 | <i>Streptomyces griseus subsp. griseus</i> | ORFAN extrapolated from Valino et al., 2012 |
| O66540 | <i>Aquifex aeolicus</i>                    | Tan et al. PDB submission (PDB : 1MZH)      |

**Table S1.** DERA used as a reference set, related to a publication, for the genome sequence driven approach.

## 2.2 DERA collection screening

The presence of aldol products were checked with a Thermo Scientific™ Dionex™ UltiMate™ 3000 Thermostatted Column Compartment Rapid Separation (TCC-3000RS) LC system (Thermo Fisher Scientific Courtaboeuf, France) coupled to QTRAP 5500 hybrid mass spectrometer (ABSciex, Toronto, Canada) equipped with an electrospray ionization (ESI) source.

### 2.2.1 Chromatography conditions

LC separation was performed using a reverse-phase chromatographic method using an ACQUITY UPLC BEN C18 column (1.7  $\mu\text{m}$ , 2.1 x 150 mm) from Waters (Milford, USA) at 50°C. The flow rate was 300  $\mu\text{L}/\text{min}$  and the sample injection volume was 10  $\mu\text{L}$ . The mobile phase A was 10 mM ammonium carbonate in water, and the mobile phase B was acetonitrile. linear gradient from 0 to 100% over a period of 7 min.

### 2.2.2 Mass spectrometry conditions

The QTRAP mass spectrometer was operating in the negative ionization mode. Analyses were performed using multiple reaction monitoring (MRM) mode with the following in-source parameters: ion source (IS) 4.5 kV, temperature (TEM) 500°C, curtain gas (CUR) 20 a.u., gas 1 (GS1) 45 a.u., gas 2 (GS2) 60 a.u., CAD – medium. For each compound of interest, the corresponding method included three or four transitions, and the most intense was used for concentration calculations.

During the method development, MRM conditions for the detection of compounds **12**, **14** and **16** were optimized using pure products as standards.

The data processing was performed using Analyst software (ABSciex). Lysates overexpressing DERA with significant activity (more than five times compared to the *E. coli* lysate control) are listed in SI File 2.

### 2.3 DERA purification

All the proteins were purified by the IMAC technique, as already described<sup>5</sup>

### 2.4 DERA activity

This assay was run at room temperature monitoring NADH absorbance at 340 nm on a 1 mL final volume solution containing: Glygly buffer (50 mM, pH 8.0), 2-deoxy-D-ribose-5-phosphate (32 mM), NADH (0.2 mM), 30 U of GPDH/TPI and 10  $\mu$ L of aldolase (1 mg mL<sup>-1</sup> solution). One mmol of NADH oxidized was equivalent to the retroaldolisation of 1 mmol of 2-deoxy-D-ribose-5-phosphate. The results are summarized in the following table:

| DERA                             | Specific activity (U mg <sup>-1</sup> ) |
|----------------------------------|-----------------------------------------|
| P0A6L0 (DERA <sub>Esch</sub> )   | 34                                      |
| B8HFF3 (DERA <sub>Arthro</sub> ) | 33                                      |
| P44430 (DERA <sub>Haemo</sub> )  | 13                                      |
| E2NRK0                           | 0.8                                     |
| G4L7G6                           | 0.2                                     |
| B7CCR8                           | 0.1                                     |
| E1QYT1                           | 0.1                                     |
| A7VWB3                           | 0.1                                     |

Table S2. Specific activity of selected purified enzymes

### 2.5 L-G3P content

An aliquot of 4  $\mu$ L was mixed with 945  $\mu$ L of Glygly buffer (50 mM, pH 8.0), 20  $\mu$ L of NADPH (12 mg mL<sup>-1</sup> solution) and 30  $\mu$ L of a L-G3P reductase solution. One mmol of NADPH oxidized was equivalent to the reduction of 1 mmol of L-G3P.

### 2.6 Analytical scale syntheses

100  $\mu$ L of a solution of D,L-G3P (30 mM) were mixed with 25  $\mu$ L of a solution of nucleophile (1M) and x mg of enzyme, x being 0,2 for propanal, acetone and cyclobutanone nucleophiles and equal to 0,5 for glycolaldehyde and 1 for cyclopentanone and DHA. Aliquots over time, from the reaction vessel, were assayed for L-G3P content as described above.

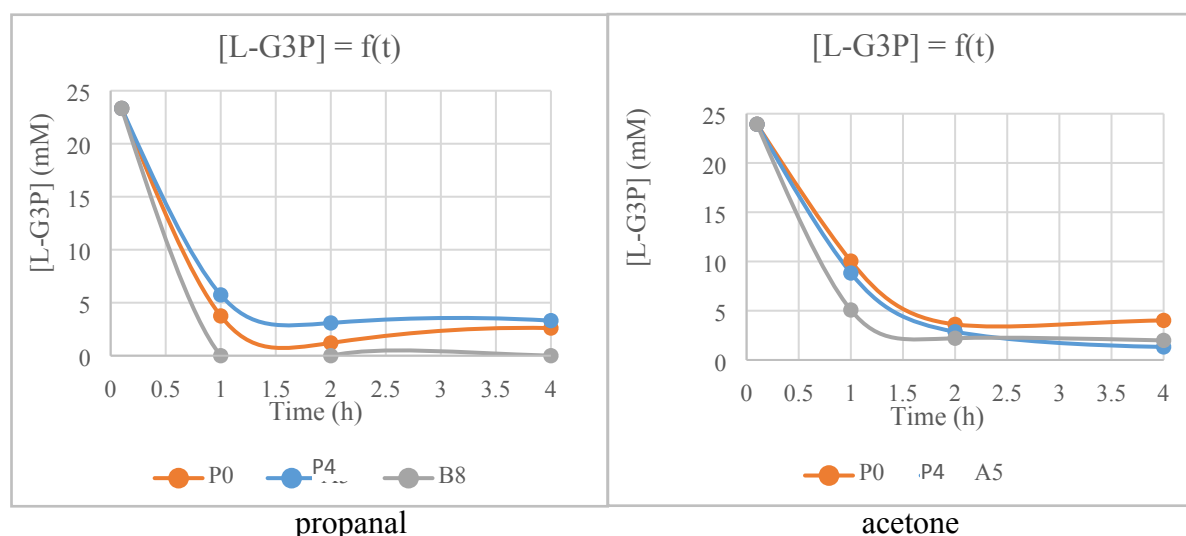

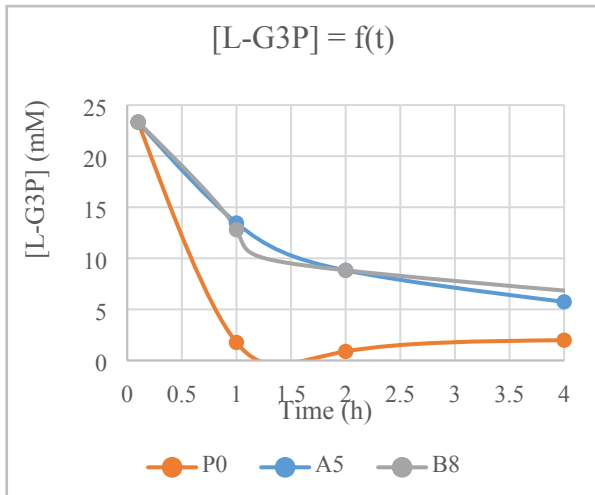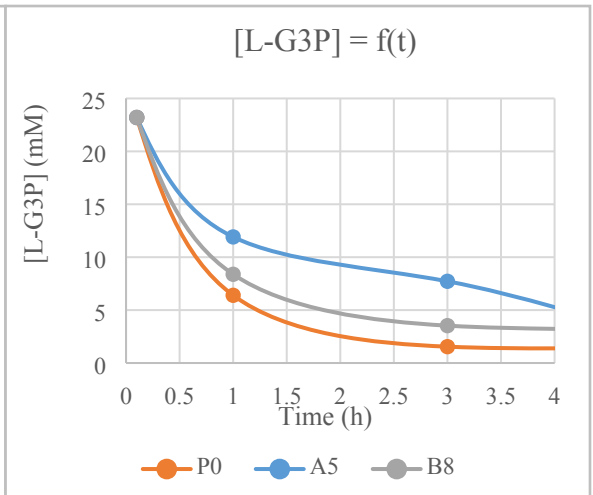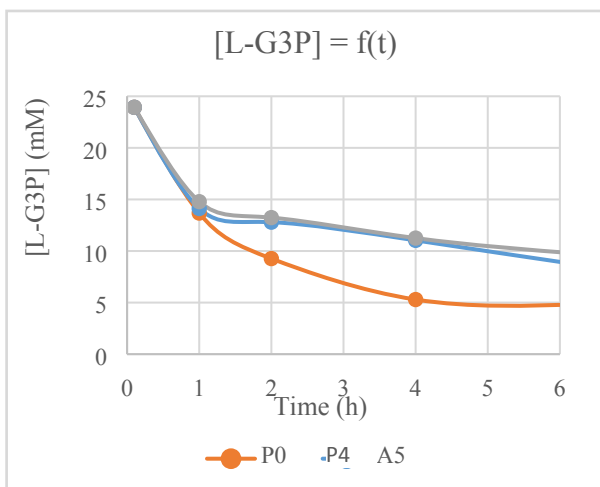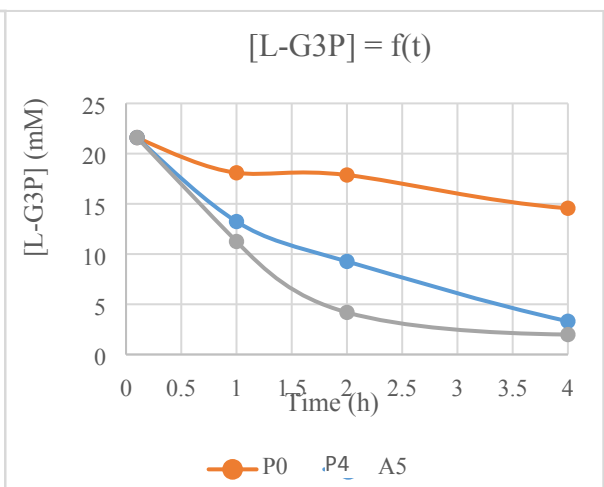

P0 = P0A6L0; P4 = P44430; B8 = B8HFF3

## 2.7 General protocol for the preparation of terminally phosphorylated monosaccharides

To a solution of L-G3P in water (100 mM) was added the nucleophile and the pH was adjusted to 7.5 using a NaOH 0.1M solution. 50 mg (25 U/mg) of B8HFF3 DERA lyophilized powder was then added and the reaction mixture was allowed to gently stir at room temperature. After total disappearance of L-G3P (using the L-G3P reductase assay), the reaction mixture was passed through an IMAC column to remove the enzyme. The eluate was partially evaporated to remove the excess of volatile nucleophile, and acetone was added to precipitate the aldol product. After centrifugation, the precipitate was washed twice with acetone, solubilized in water, and then lyophilized.

### 2.7.1 (2S,3S,4R)-2,3-dihydroxy-4-methyl-5-oxopentyl phosphate **11** (2-deoxy-2-methyl-L-xylose-5-phosphate)

L-G3P solution (70 mM, 3 mL, 201  $\mu$ moles) and propanal (60  $\mu$ L, 810  $\mu$ moles, 4 eq.) gave 48 mg (88 %) of compound **11**.

### 2.7.2 (2S,3S)-2,3-dihydroxy-5-oxohexylphosphate **12** (1,3-dideoxy-L-sorbose-6-phosphate)

L-G3P solution (105 mM, 1.9 mL, 201  $\mu$ moles) and acetone (60  $\mu$ L, 810  $\mu$ moles, 4 eq.) gave 36 mg (72%) of compound **12**.

### 2.7.3 (2S,3S)-2,3-dihydroxy-3-(2-oxocyclobutyl)propyl phosphate **13**

L-G3P solution (107 mM, 1.9 mL, 201  $\mu$ moles) and cyclobutanone (61  $\mu$ L, 810  $\mu$ moles, 4 eq.) gave 39 mg (74 %) of compound **13**.

### 2.7.4 (2S,3S)-2,3-dihydroxy-3-(2-oxocyclopentyl)propyl phosphate **14**

L-G3P solution (40 mM, 4.9 mL, 201  $\mu$ moles) and cyclopentanone (72  $\mu$ L, 810  $\mu$ moles, 4 eq.) gave 37 mg (68 %) of compound **14**.

### 2.7.5 (2S,3R,4R)-2,3,4-trihydroxy-5-oxopentyl phosphate **15** (L-lyxose-5-phosphate)

L-G3P solution (31 mM, 6 mL, 186  $\mu$ moles) and glycolaldehyde (44 mg, 744  $\mu$ moles, 4 eq.) gave 42 mg (89%) of compound **15**.

### 2.7.6 (2S,3R,4R)-2,3,4,6-tetrahydroxy-5-oxohexyl phosphate **16** (L-tagatose-6-phosphate)

L-G3P solution (70 mM, 3 mL, 201  $\mu$ moles) and DHA (73 mg, 810  $\mu$ moles, 4 eq.) gave 40 mg (65 %) of compound **16**.

## 2.8 Characterization of the aldols

Nuclear magnetic resonance (NMR) spectra were measured in deuterated solvents (D<sub>2</sub>O) on a Bruker AC-400 spectrometer (400 MHz for <sup>1</sup>H and 100 MHz for <sup>13</sup>C) spectrometer. Conventional 1D <sup>1</sup>H and 1D <sup>13</sup>C, selective 1D NOESY and 2D COSY, 2D HSQC, 2D multiplicity-edited HSQC and 2D NOESY experiments were collected using a standard Bruker software and acquired under routine conditions and variable temperature. The residual solvent signal was used as the internal standard; chemical shifts ( $\delta$ ) are expressed in parts per million and coupling constants (*J*) in Hertz. Electrospray ionization mass spectra (ESI-MS) were recorded on a micro q-tof Micromass (3000 V) and high-resolution mass spectra (HR-MS) were recorded on the same instrument with an internal lock mass (H<sub>3</sub>PO<sub>4</sub>) and an external lock mass (Leu-enkephalin).

**2.8.1** (2*S*,3*S*,4*R*)-2,3-dihydroxy-4-methyl-5-oxopentyl phosphate **11** (2-deoxy-2-methyl-L-xylose-5-phosphate)

Mixture of anomers  $\alpha$  and  $\beta$ , the latter being the major compound.

$\beta$ -anomer:  $^1\text{H}$  NMR (400 MHz,  $\text{D}_2\text{O}$ )  $\delta$  5.12 (d,  $J = 6.8$  Hz, 1H, H1), 4.28 (m, 1H, H4), 4.19 (m, 1H, H3), 3.88 (m, 1H, H5), 3.82 (m, 1H, H5'), 2.15 (td,  $J = 7.0, 4.6$  Hz, 1H, H2), 1.02 (d,  $J = 7.1$  Hz, 3H,  $\text{CH}_3$ ).

$^{13}\text{C}$  NMR (101 MHz,  $\text{D}_2\text{O}$ )  $\delta$  103.6 (C1), 81.4 (d,  $J = 7.2$  Hz, C4), 73.6 (C3), 62.5 (d,  $J = 4.2$  Hz, C5), 45.7 (C2), 9.0 ( $\text{CH}_3$ ).

$\alpha$ -anomer:  $^1\text{H}$  NMR (400 MHz,  $\text{D}_2\text{O}$ )  $\delta$  5.22 (d,  $J = 5.3$  Hz, 1H, H1), 4.28 (m, 1H, H4), 4.19 (m, 1H, H3), 4.16 (m, 1H, H5), 4.01 (m, 1H, H5'), 2.24 (dt,  $J = 7.2, 5.0$  Hz, 1H, H2), 0.98 (d,  $J = 7.1$  Hz, 3H).

$^{13}\text{C}$  NMR (101 MHz,  $\text{D}_2\text{O}$ )  $\delta$  99.6 (C1), 82.4 (d,  $J = 7.3$  Hz, C4), 72.2 (C3), 63.4 (d,  $J = 4.5$  Hz, C5), 42.2 (C2), 7.2 ( $\text{CH}_3$ ).

HRMS ESI-:  $m/z$  calculated for  $[\text{C}_6\text{H}_{13}\text{O}_7\text{P}-\text{H}] = 227.0326$ , found: 227.0319.

$^1\text{H}$ ,  $^{13}\text{C}$ , 2D 1H- 1H COSY and HSQC NMR as well as NOESY spectra ( $\text{D}_2\text{O}$ ) of the aldol adduct from the addition of propanal to L-G3P.

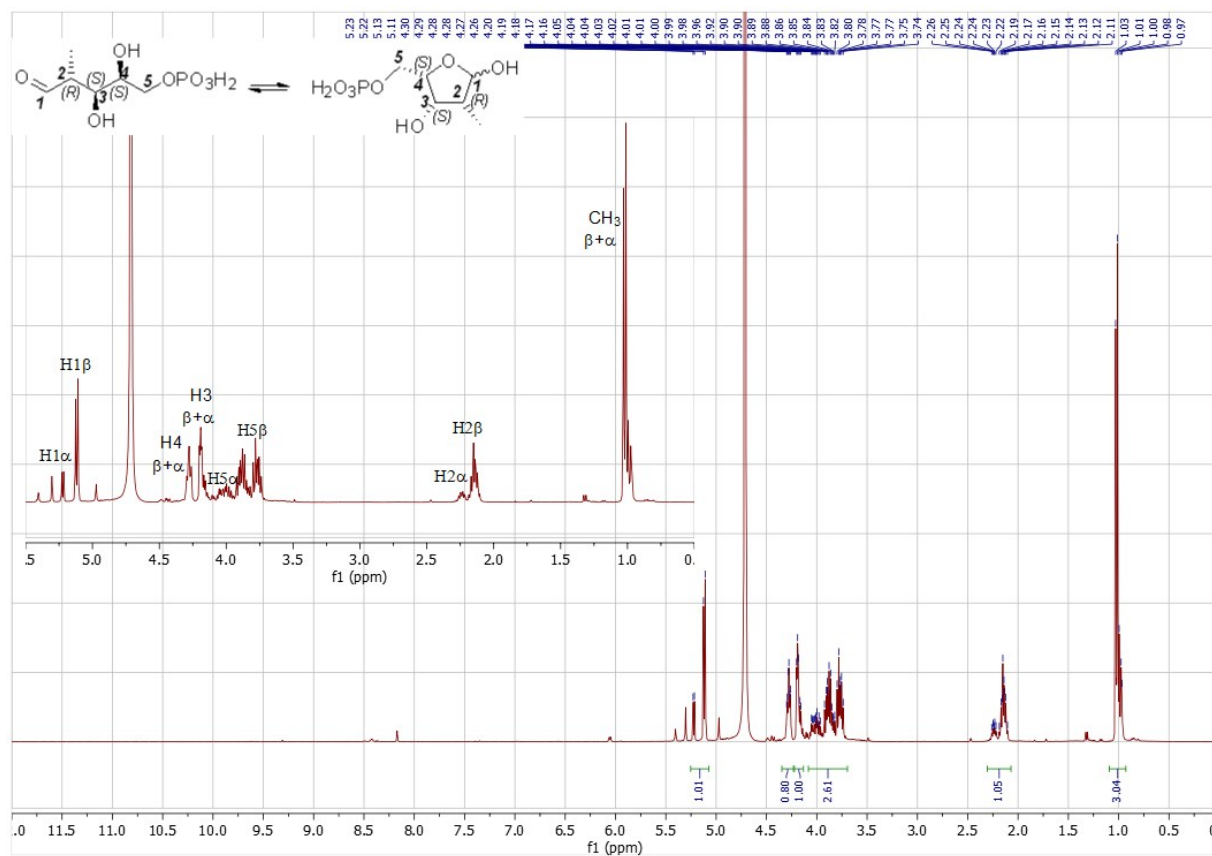

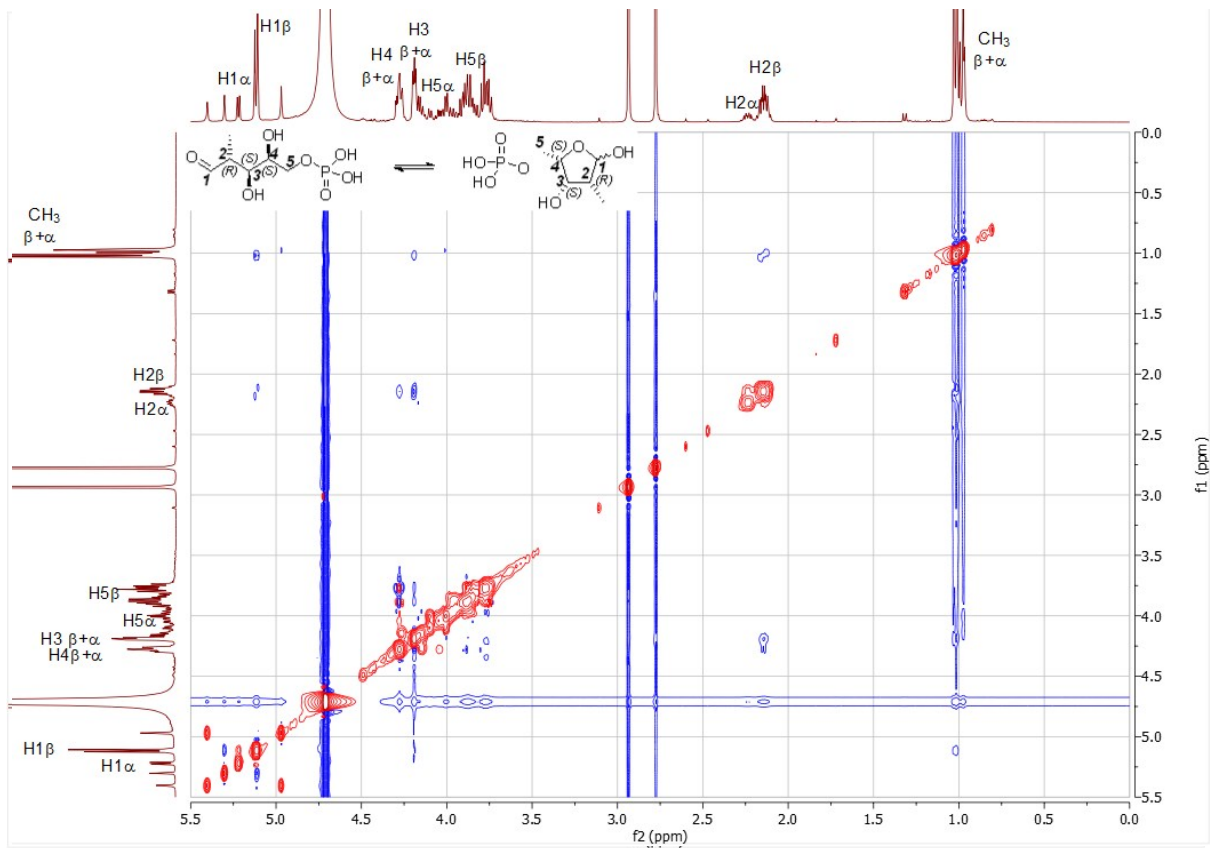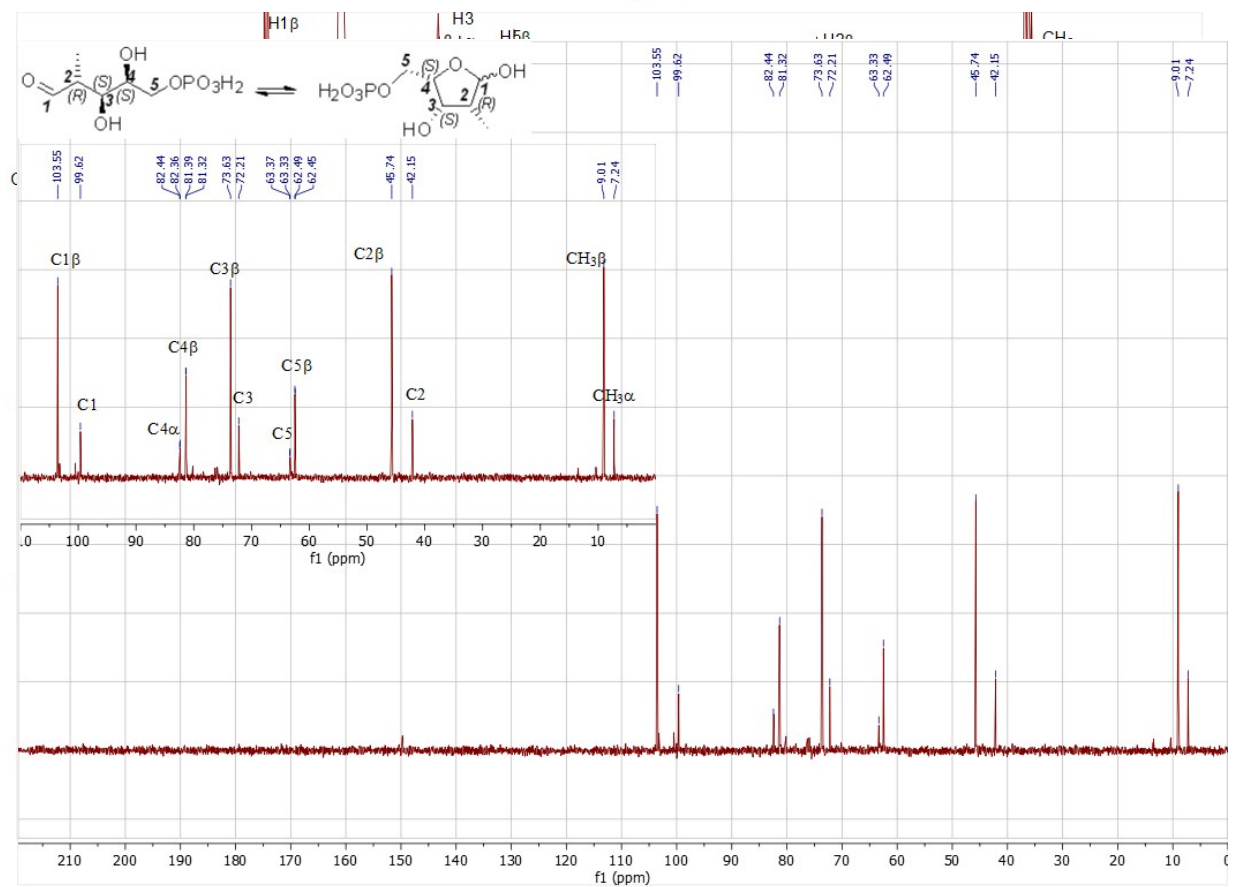



## 2.8.2 (2*S*,3*S*)-2,3-dihydroxy-5-oxohexylphosphate **12** (1,3-dideoxy-*L*-sorbose-6-phosphate)

The ultra-major product is the linear compound:

$^1\text{H}$  NMR (400 MHz,  $\text{D}_2\text{O}$ )  $\delta$  4.17 (ddd,  $J = 8.4, 4.8, 3.7$  Hz, 1H, H4), 3.81 (2d,  $J = 14.3, 8.4$  Hz, 2H, H6), 3.67 (ddd,  $J = 12.1, 8.4, 4.3$  Hz, 1H, H5), 2.75 (m, 2H, H3), 2.21 (s, 3H, H1).

$^{13}\text{C}$  NMR (101 MHz,  $\text{D}_2\text{O}$ )  $\delta$  213.8 (C2), 72.7 (d,  $J = 7.3$  Hz, C5), 67.2 (C4), 65.4 (d,  $J = 5.1$  Hz, C6), 46.4 (C3), 29.9 (C1).

HRMS ESI-:  $m/z$  calculated for  $[\text{C}_6\text{H}_{13}\text{O}_7\text{P}-\text{H}] = 227.0326$ , found: 227.0321.

$^1\text{H}$  and  $^{13}\text{C}$  NMR spectra ( $\text{D}_2\text{O}$ ) of the aldol adduct from the addition of acetone to *L*-G3P.

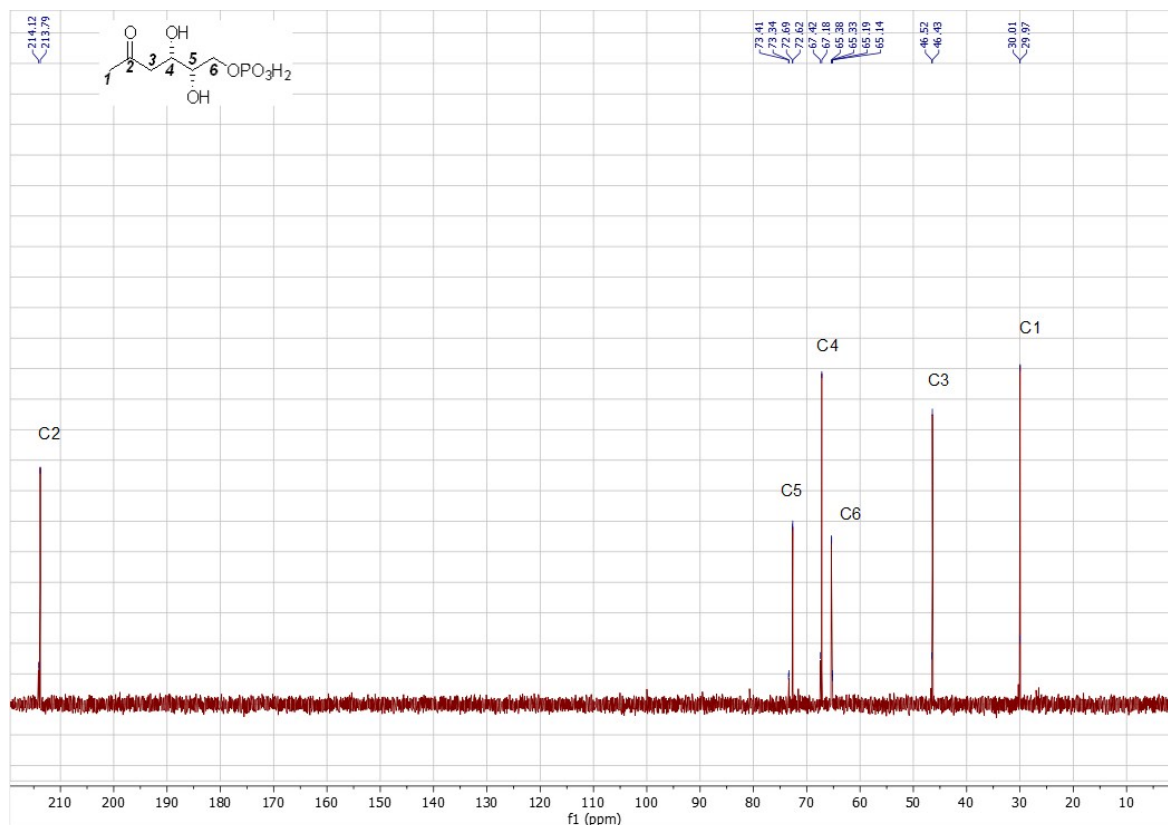

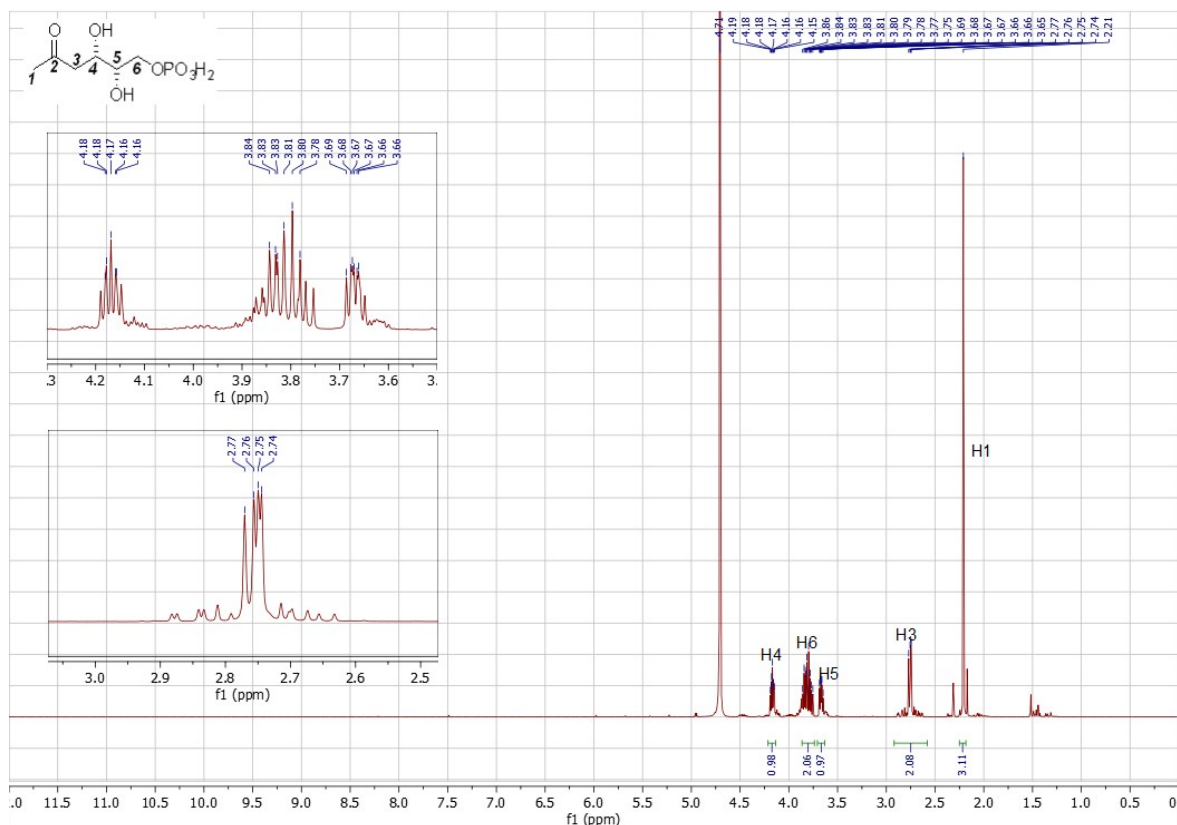

### 2.8.3 (2S,3S)-2,3-dihydroxy-3-(2-oxocyclobutyl)propyl phosphate 13

The ultra-major product is the linear compound in two epimeric forms (A and B) at C1' (deuterium isotopic exchange of H1' in D<sub>2</sub>O):

Form A: <sup>1</sup>H NMR (400 MHz, D<sub>2</sub>O) δ 3.99 (d, *J* = 3.8 Hz, 1H, H3), 3.78 (m, 3H, H1a+H1b+H2), 3.06 (m, 1H, H3'a), 2.90 (m, 1H, H3'b), 2.16 (m, 1H, H4'b), 1.87 (ddd, *J* = 11.1, 10.0, 7.5 Hz, 1H, H4'a).

<sup>13</sup>C NMR (101 MHz, D<sub>2</sub>O) δ 216.6 (C2'), 71.9 (d, *J* = 7.4 Hz, C2), 68.7 (C3), 65.4 (d, *J* = 5.1 Hz, C1), 61.3 (C1', isotopic exchange), 45.1 (C3'), 12.3 (C4').

Form B: <sup>1</sup>H NMR (400 MHz, D<sub>2</sub>O) δ 3.86 (d, *J* = 3.2 Hz, 1H, H3), 3.78 (m, 3H, H1a+H1b+H2), 3.06 (m, 1H, H3'a), 2.90 (m, 1H, H3'b), 2.16 (m, 1H, H4'b), 2.05 (ddd, *J* = 11.1, 9.8, 7.6 Hz, 1H, H4'a).

<sup>13</sup>C NMR (101 MHz, D<sub>2</sub>O) δ 216.7 (C2'), 71.1 (d, *J* = 7.4 Hz, C2), 70.0 (C3), 65.4 (d, *J* = 5.1 Hz, C1), 61.3 (C1', isotopic exchange), 44.26 (C3'), 13.1 (C4').

HRMS ESI-: *m/z* calculated for [C<sub>7</sub>H<sub>12</sub>DO<sub>7</sub>P-H] = 240.0389, found: 240.0385.

<sup>1</sup>H, <sup>13</sup>C, 2D <sup>1</sup>H-<sup>1</sup>H COSY and HSQC NMR spectra (D<sub>2</sub>O) of the aldol adduct from the addition of cyclobutanone to L-G3P.

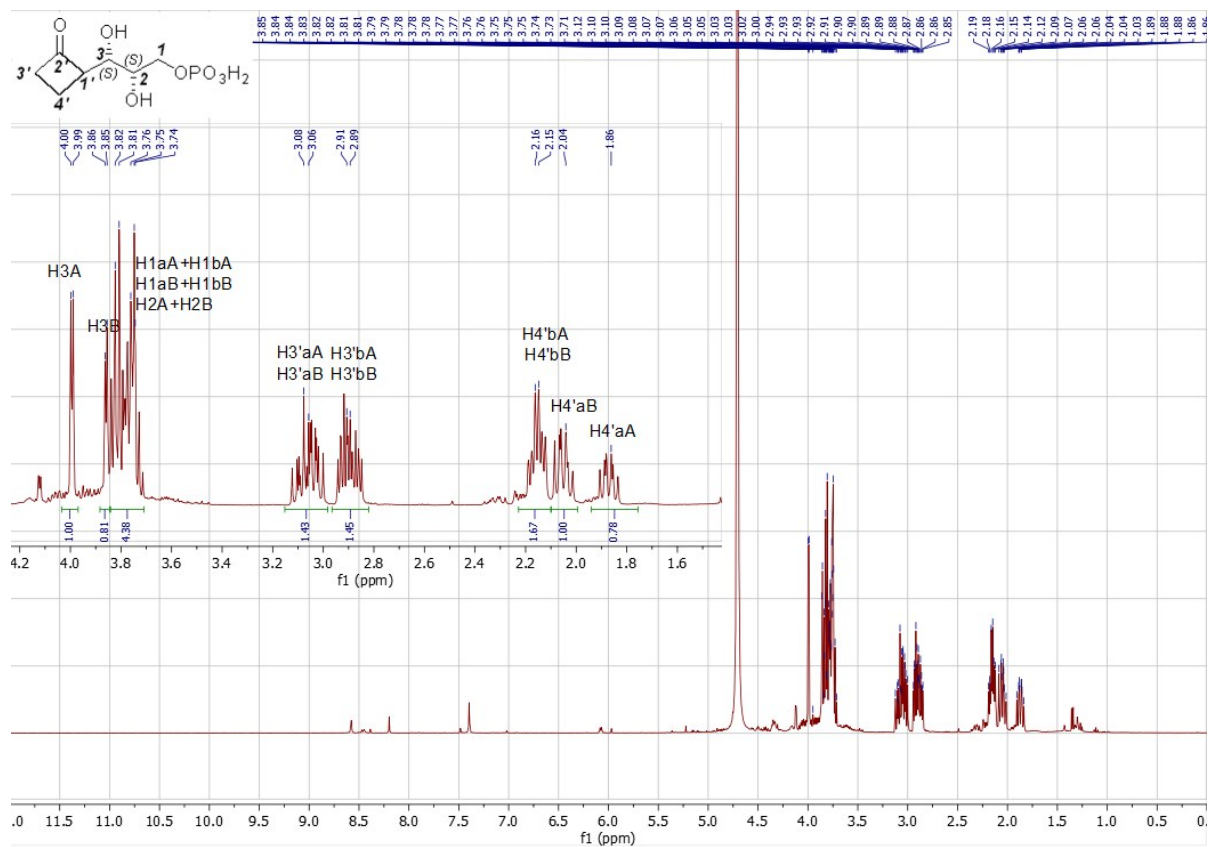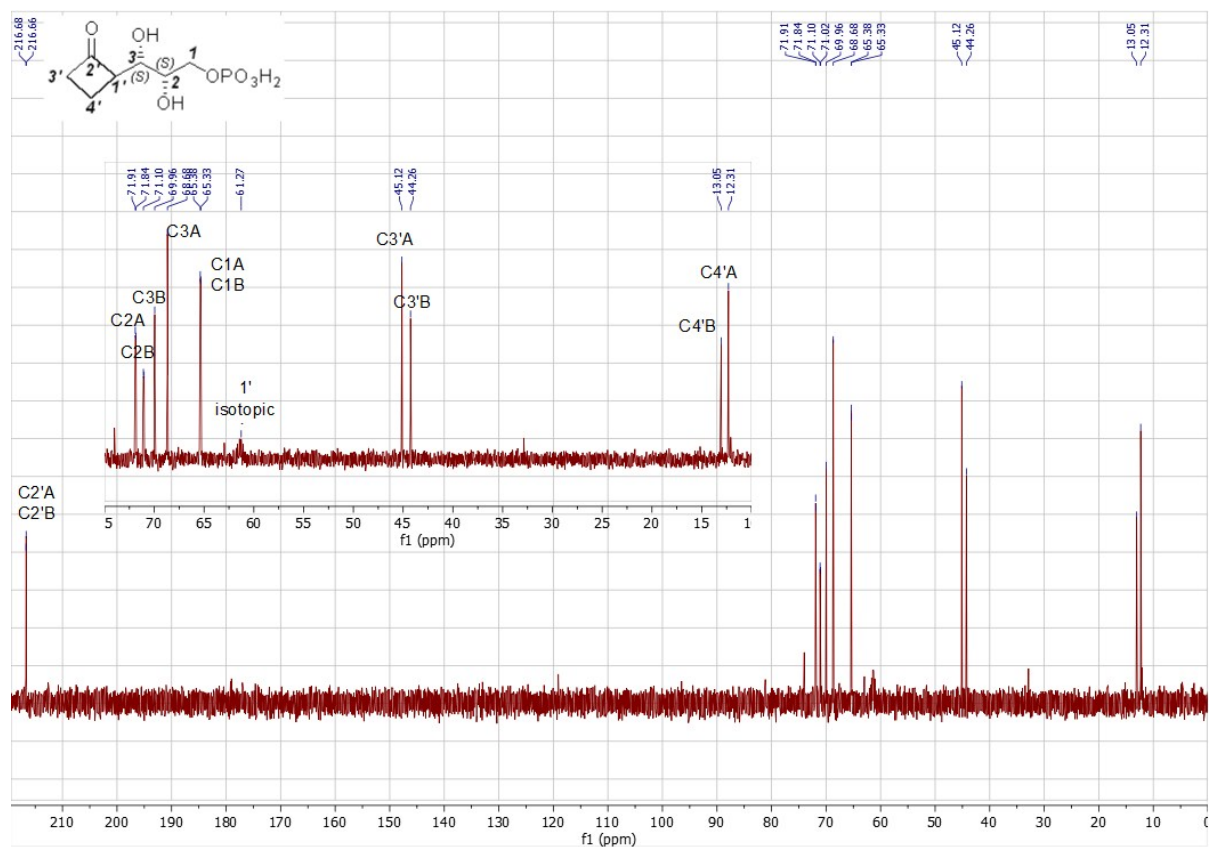

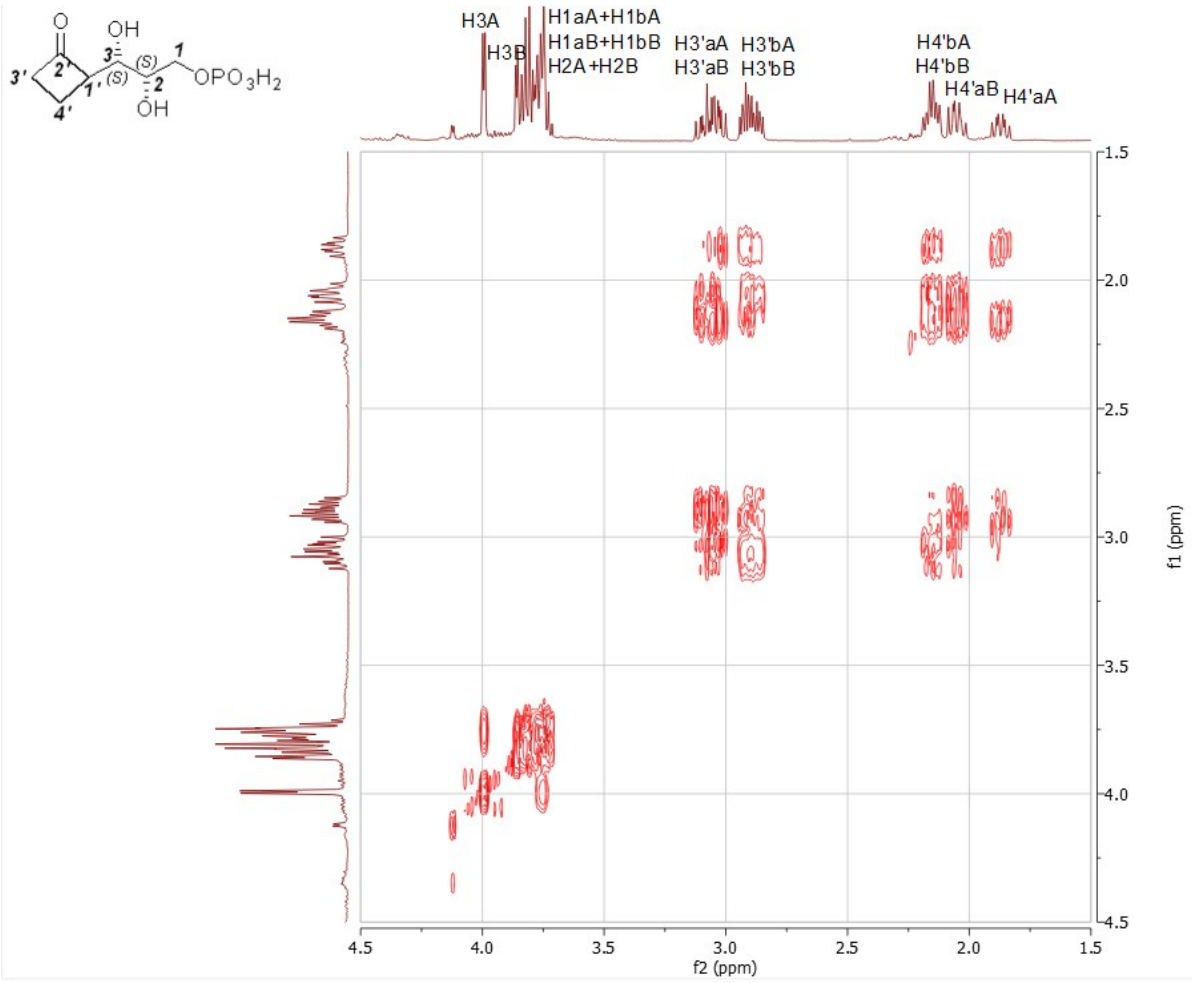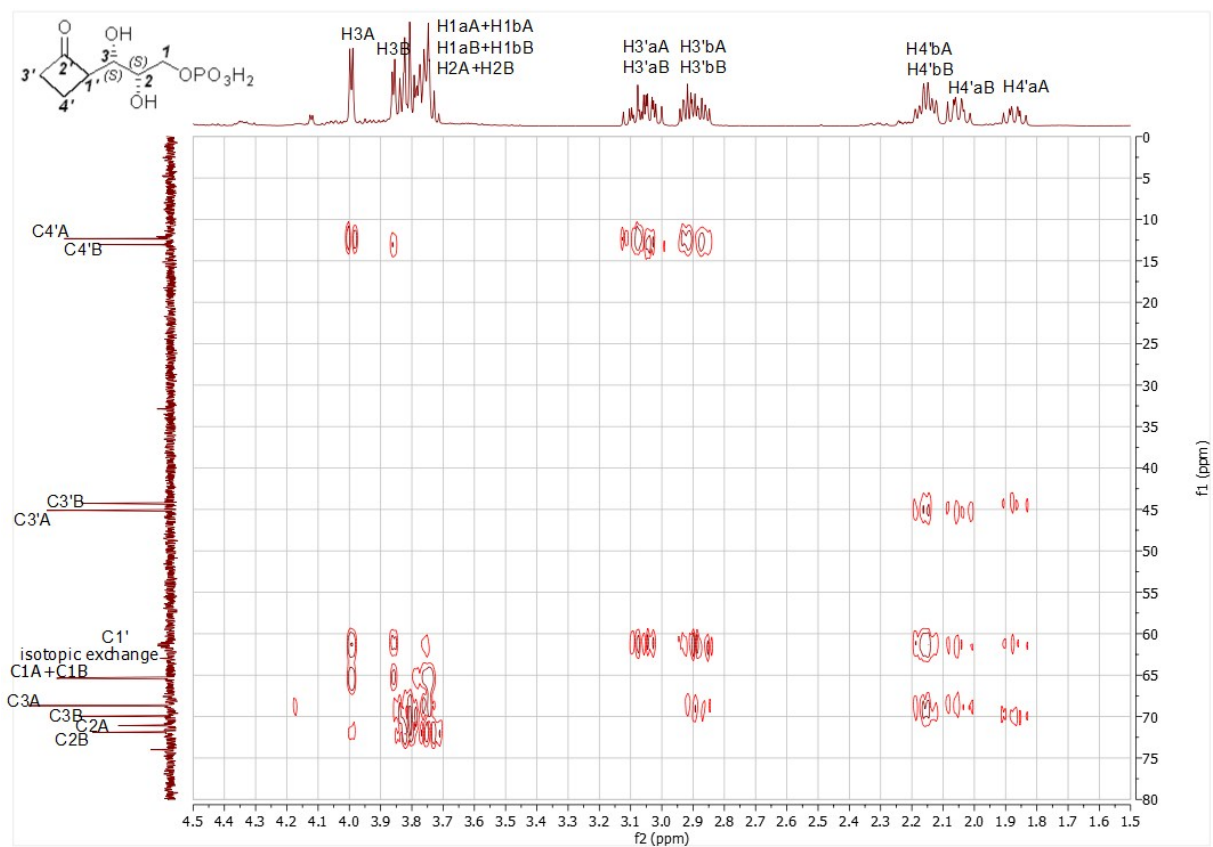

## 2.8.4 (2*S*,3*S*)-2,3-dihydroxy-3-(2-oxocyclopentyl)propyl phosphate **14**

The spectra are identical to those already published.<sup>6</sup>

The major product is the linear compound in two epimeric forms (A and B) at C1' (deuterium isotopic exchange of H1' in D<sub>2</sub>O):

Form A: <sup>1</sup>H NMR (400 MHz, D<sub>2</sub>O) δ 4.11 (d, *J* = 4.6 Hz, 1H, H3), 4.05-3.50 (m, 3H, H1a+H1b+H2), 2.45-1.70 (m, 6H, H3'a+H3'b+H4'a+H4'b+H5'a+H5'b).

<sup>13</sup>C NMR (101 MHz, D<sub>2</sub>O) δ 226.5 (C2'), 72.6 (d, *J* = 6.8 Hz, C2), 69.6 (C3), 65.0 (d, *J* = 4.4 Hz, C1), 51.2 (C1': isotopic exchange), 38.9 (C3'), 23.2 (C5'), 20.16 (C4').

Form B: <sup>1</sup>H NMR (400 MHz, D<sub>2</sub>O) δ 4.10 (d, *J* = 5.6 Hz, 1H, H3), 4.05-3.50 (m, 3H, H1a+H1b+H2), 2.45-1.70 (m, 6H, H3'a+H3'b+H4'a+H4'b+H5'a+H5'b).

<sup>13</sup>C NMR (101 MHz, D<sub>2</sub>O) δ 227.0 (C2'), 71.4 (d, *J* = 6.8 Hz, C2), 70.5 (C3), 65.0 (d, *J* = 4.4 Hz, C1), 51.2 (C1': isotopic exchange), 38.6 (C3'), 28.3 (C5'), 26.4 (C4').

<sup>1</sup>H and <sup>13</sup>C NMR spectra (D<sub>2</sub>O) of the aldol adduct from the addition of cyclopentanone to L-G3P.

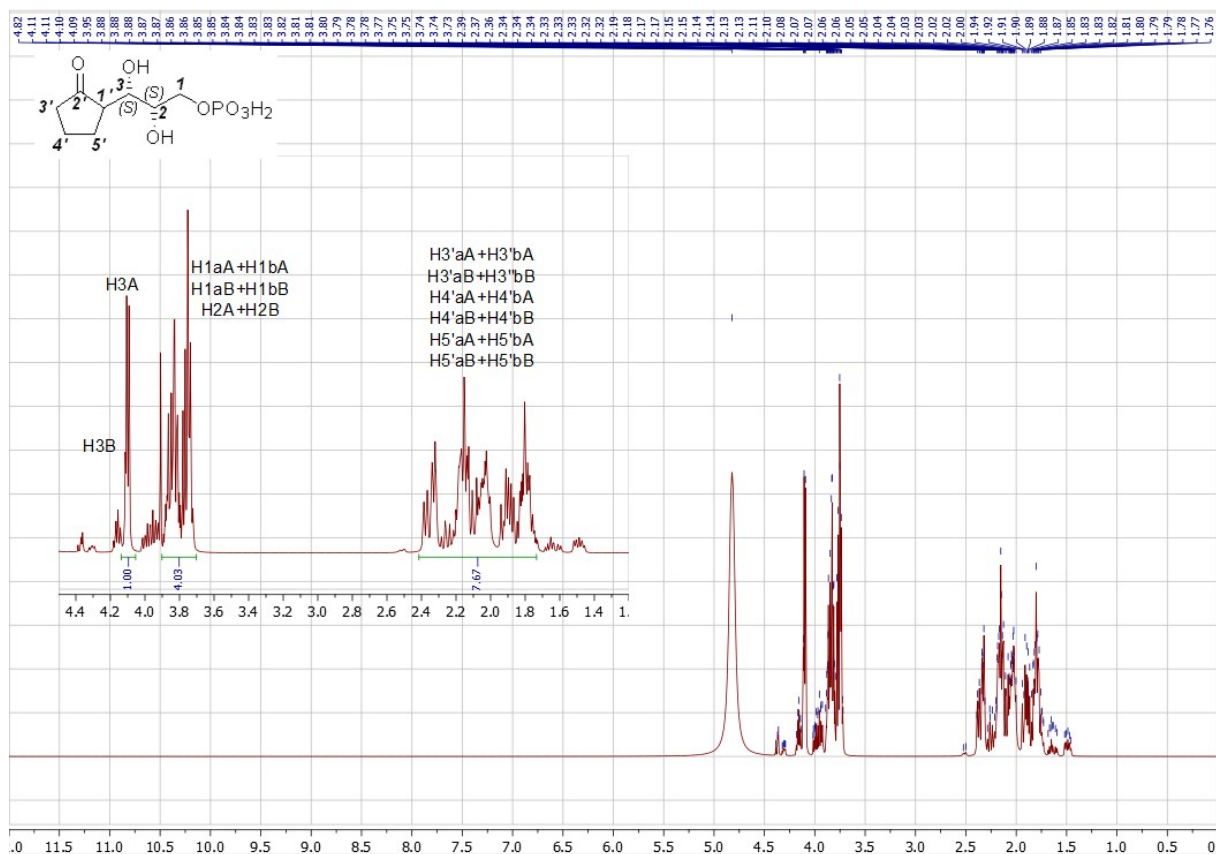

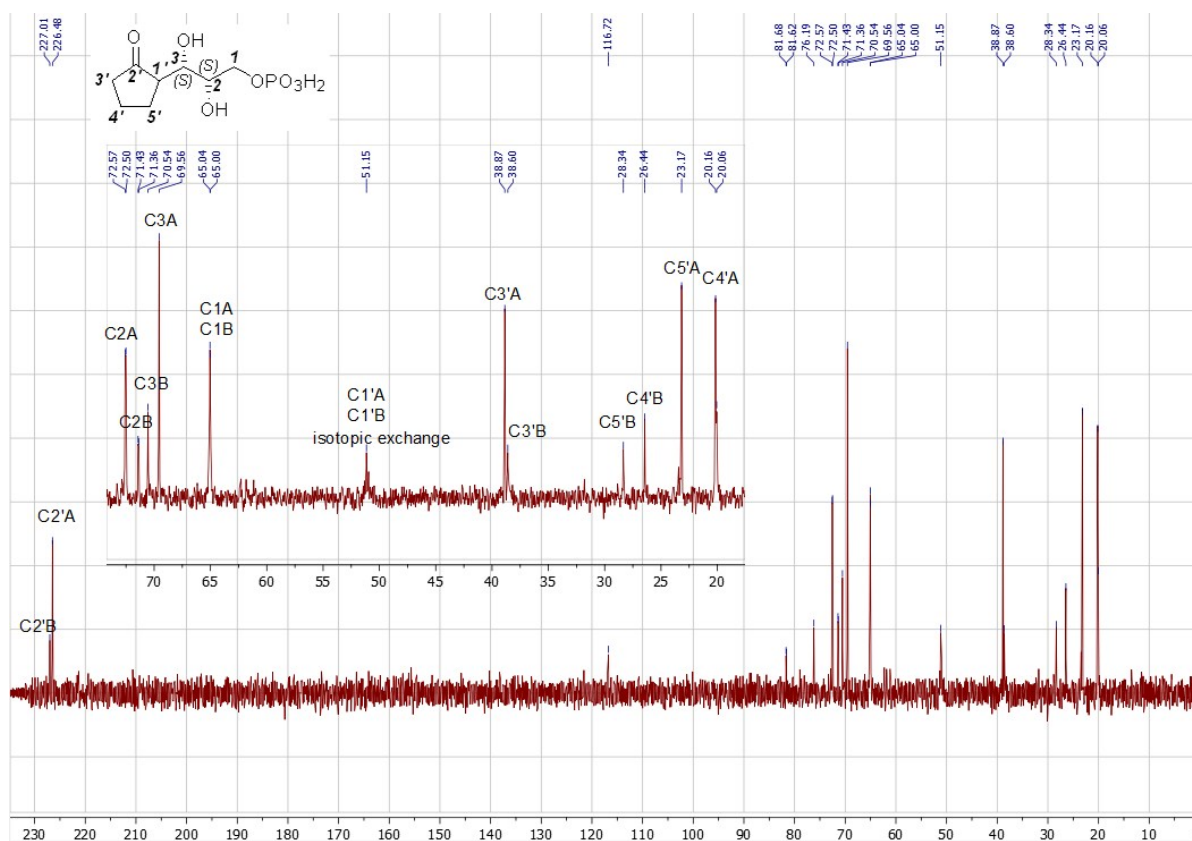

### 2.8.5 (2*S*,3*R*,4*R*)-2,3,4-trihydroxy-5-oxopentyl phosphate **15** (*L*-lyxose-5-phosphate)

The spectra were identical to those already published<sup>77</sup>

Mixture of anomers  $\alpha$  and  $\beta$ , the latter being the major compound.

$\beta$ -anomer:  $^1\text{H}$  NMR (400 MHz,  $\text{D}_2\text{O}$ )  $\delta$  5.21 (d,  $J = 4.8$  Hz, 1H, H1), 4.31 (m, 1H, H4), 4.25 (dd,  $J = 4.5, 3.3$  Hz, 1H, H3), 4.02 (t,  $J = 4.5$  Hz, 1H, H2), 3.90 (m, 1H, H5), 3.79 (m, 1H, H5').

$^{13}\text{C}$  NMR (101 MHz,  $\text{D}_2\text{O}$ )  $\delta$  101.5 (C1), 80.0 (d,  $J = 6.9$  Hz, C4), 77.7 (C2), 71.8 (C3), 63.1 (d,  $J = 4.5$  Hz, C5).

$\alpha$ -anomer:  $^1\text{H}$  NMR (400 MHz,  $\text{D}_2\text{O}$ )  $\delta$  5.20 (d,  $J = 4.8$  Hz, 1H, H1), 4.25 (dd,  $J = 4.7, 3.3$  Hz, 1H, H3), 4.17 (t,  $J = 4.7$  Hz, 1H, H2), 4.02 (m, 1H, H4), 3.90 (m, 1H, H5), 3.79 (m, 1H, H5').

$^{13}\text{C}$  NMR (101 MHz,  $\text{D}_2\text{O}$ )  $\delta$  96.1 (C1), 80.2 (d,  $J = 6.9$  Hz, C4), 72.3 (C2), 70.5 (C3), 63.4 (d,  $J = 4.5$  Hz, C5).

HRMS ESI<sup>-</sup>,  $m/z$  calcd. for  $[\text{C}_6\text{H}_{12}\text{O}_9\text{P}-\text{H}] = 229.0119$ , found 229.0114.



$^1\text{H}$ ,  $^{13}\text{C}$ , spectra ( $\text{D}_2\text{O}$ ) of the aldol adduct from the addition of glycolaldehyde to L-G3P.

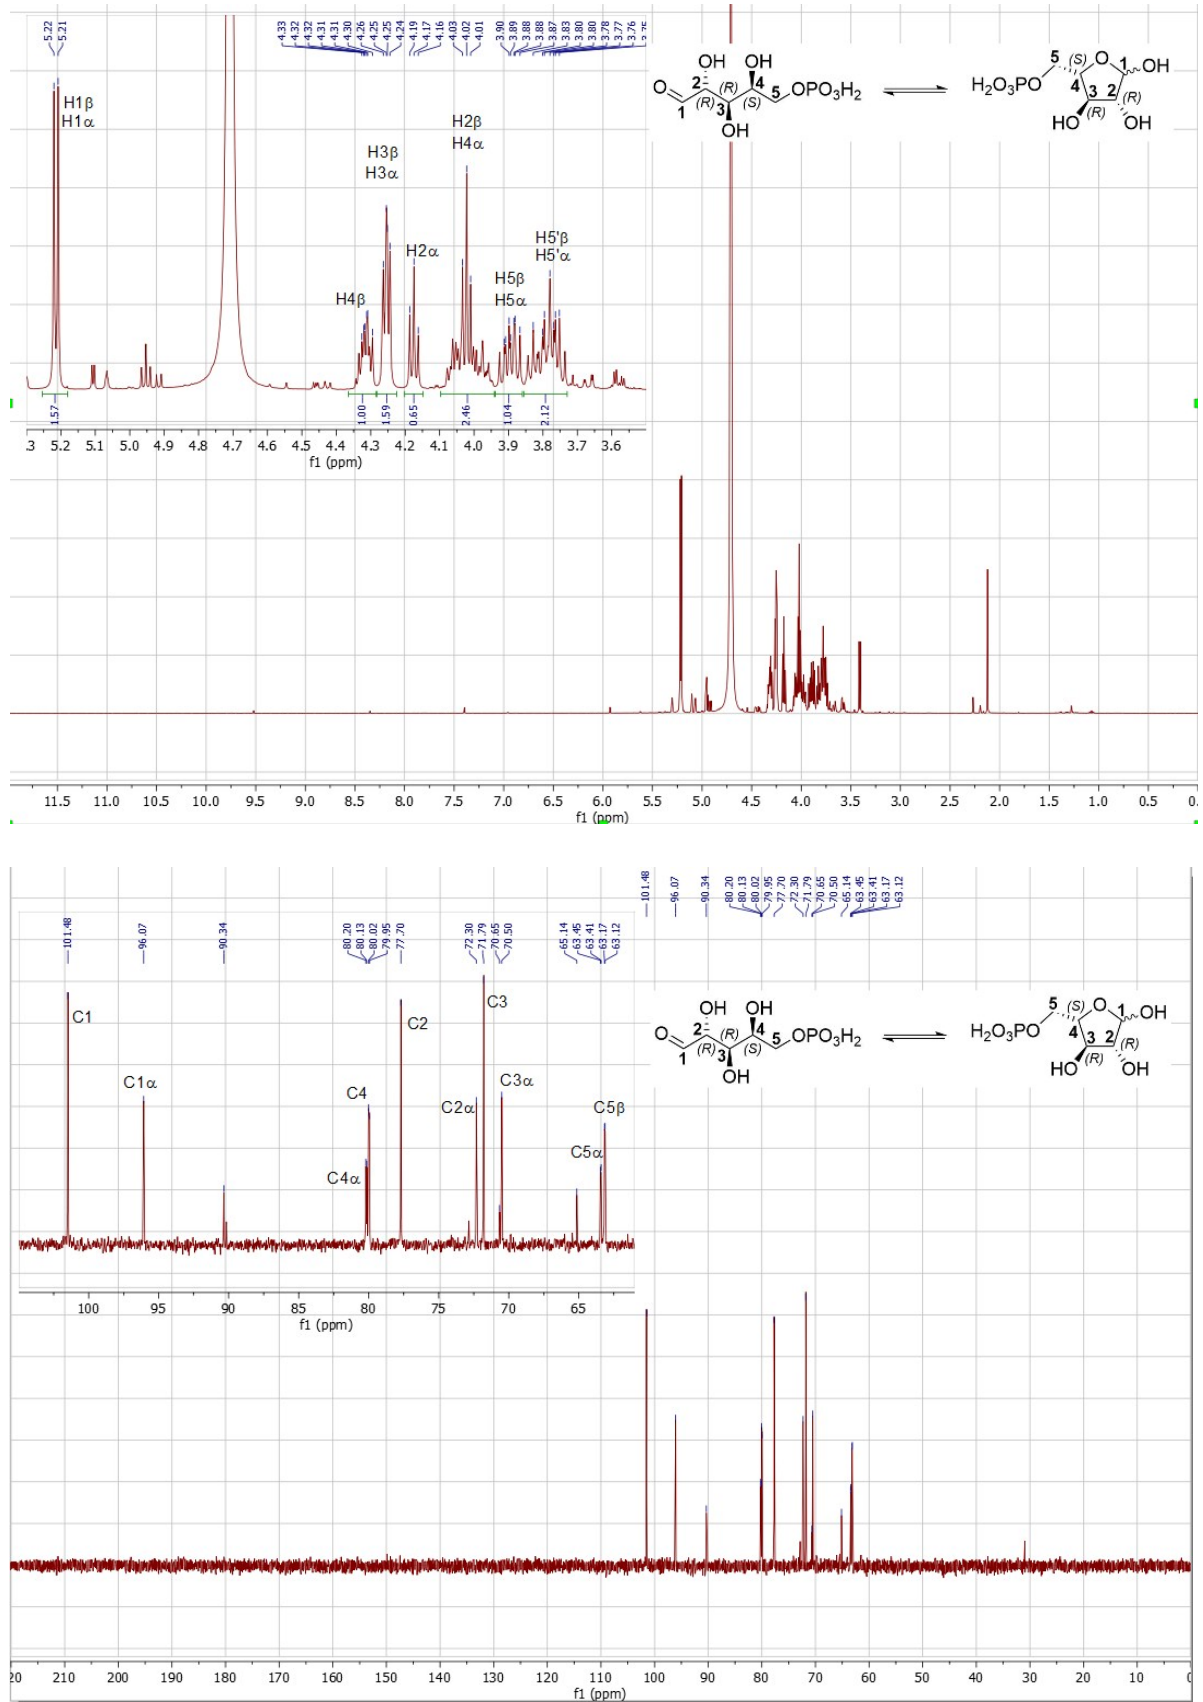

**2.8.6** (2*S*,3*R*,4*R*)-2,3,4,6-tetrahydroxy-5-oxohexyl phosphate **16** (L-tagatose-6-phosphate)

The spectra were identical to those already published.<sup>8</sup>

Mixture of anomers  $\alpha$  and  $\beta$ ,  $\beta$  being the major compound.

$\beta$ -anomer:  $^1\text{H}$  NMR (400 MHz,  $\text{D}_2\text{O}$ )  $\delta$  4.31 (m, 1H, H4), 4.18 (d,  $J = 4.8$  Hz, 1H, H3), 4.10 (td,  $J = 6.6, 3.5$  Hz, 1H, H5), 4.02 (dt,  $J = 10.8, 6.6$  Hz, 1H, H6), 3.85 (m, 1H, H6'), 3.53 (d,  $J = 12.1$  Hz, 1H, H1), 3.48 (d,  $J = 12.1$  Hz, 1H, H1').

$^{13}\text{C}$  NMR (101 MHz,  $\text{D}_2\text{O}$ )  $\delta$  102.7 (C2), 79.3 (d,  $J = 7.2$  Hz, C5), 70.9 (C4), 70.5 (C3), 62.9 (d,  $J = 4.6$  Hz, C6), 62.5 (C1).

$\alpha$ -anomer:  $^1\text{H}$  NMR (400 MHz,  $\text{D}_2\text{O}$ )  $\delta$  4.35 (m, 1H, H4), 4.31 (m, 1H, H5), 4.18 (d,  $J = 4.8$  Hz, 1H, H3), 3.95 (m, 1H, H6), 3.82 (m, 1H, H6'), 3.63 (d,  $J = 11.9$  Hz, 1H, H1), 3.58 (d,  $J = 11.9$  Hz, 1H, H1').

$^{13}\text{C}$  NMR (101 MHz,  $\text{D}_2\text{O}$ )  $\delta$  105.1 (C2), 78.5 (d,  $J = 7.7$  Hz, C5), 77.3 (C3), 71.3 (C4), 64.8 (C1), 62.7 (d,  $J = 4.6$  Hz, C6).

HRMS ESI<sup>-</sup>,  $m/z$  calcd. for  $[\text{C}_6\text{H}_{12}\text{O}_9\text{P}-\text{H}] = 253.0224$ , found 259.0226.

$^1\text{H}$ ,  $^{13}\text{C}$ , 2D  $^1\text{H}$ - $^1\text{H}$  COSY and HSQC NMR spectra ( $\text{D}_2\text{O}$ ) of the aldol adduct from the addition of DHA to L-G3P.

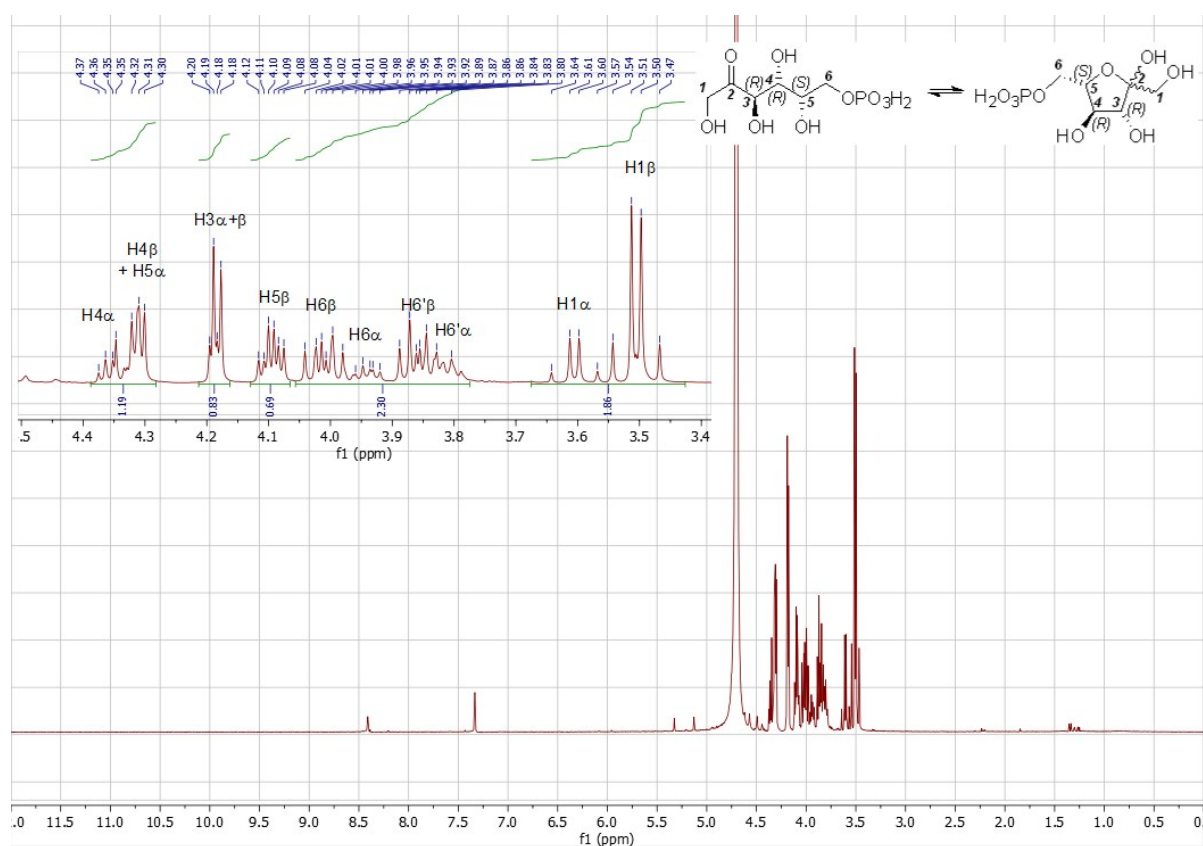



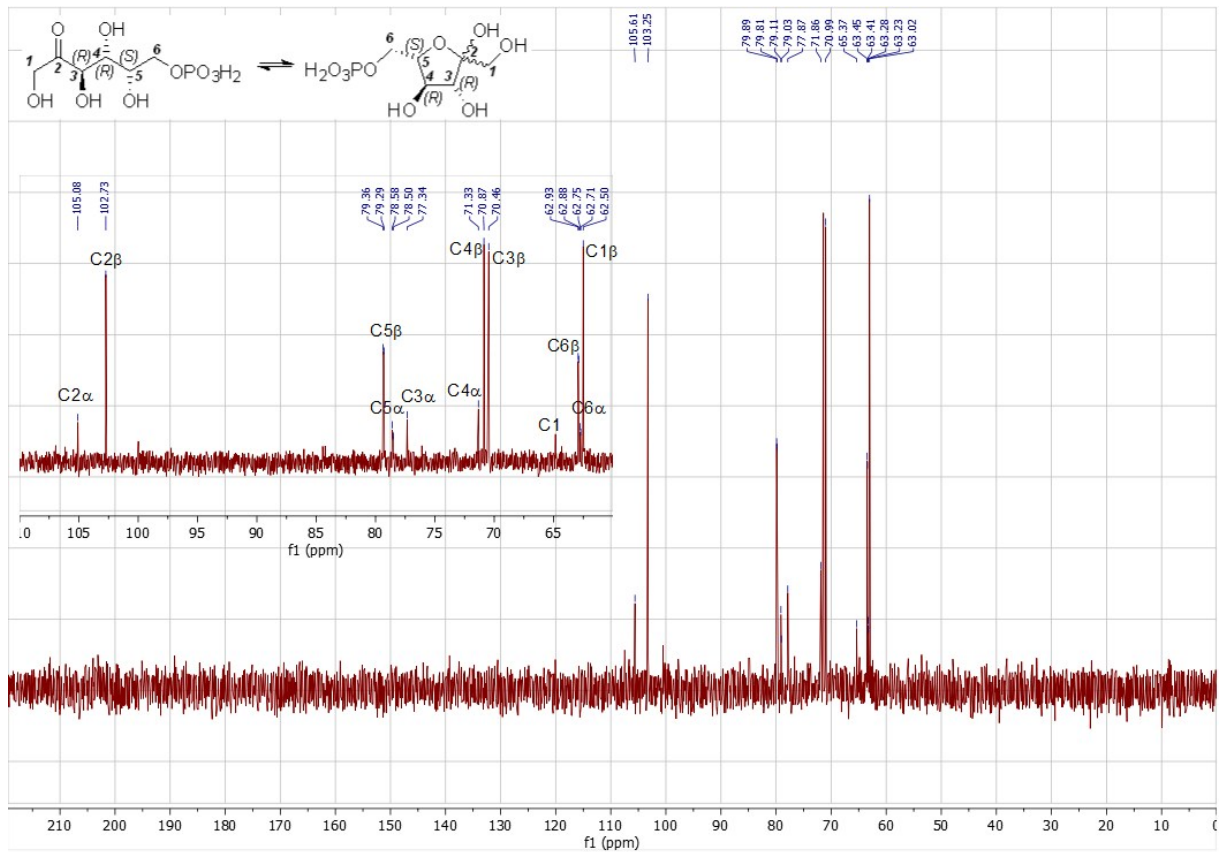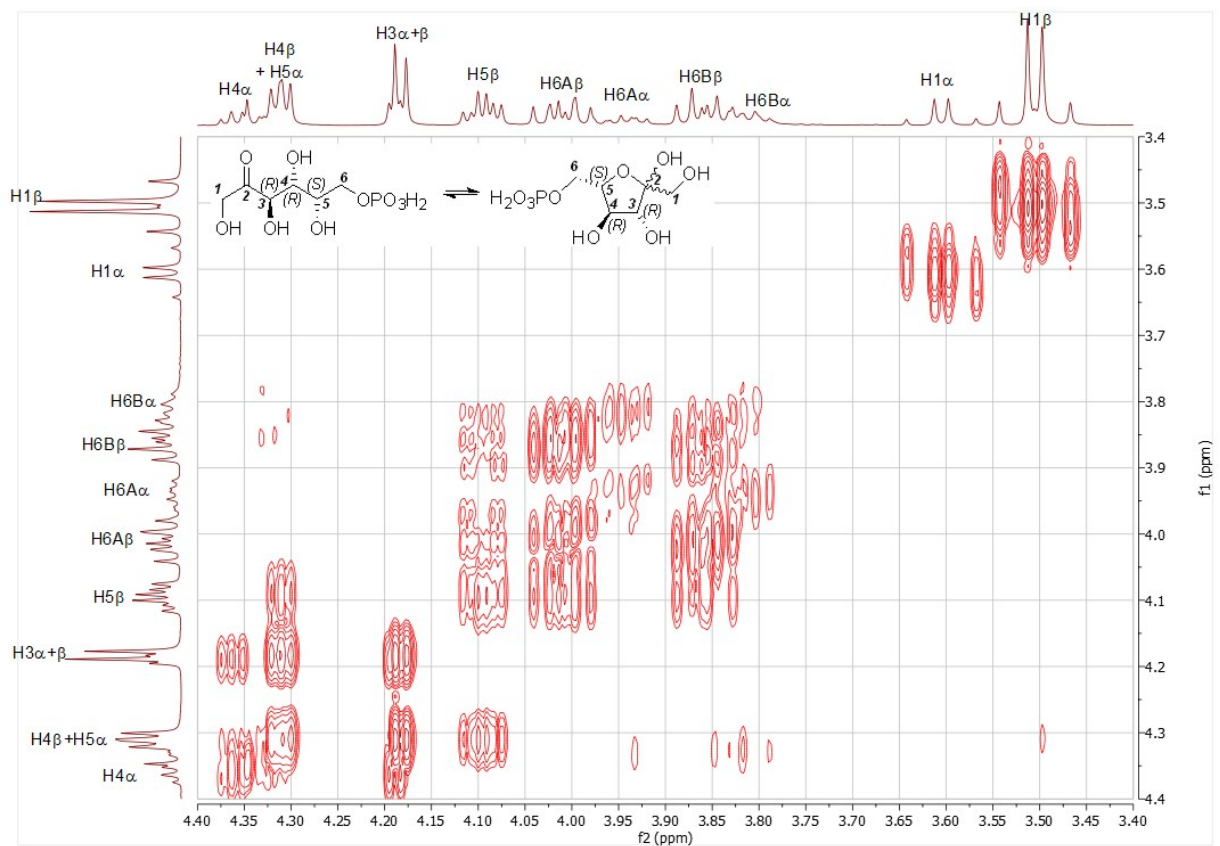

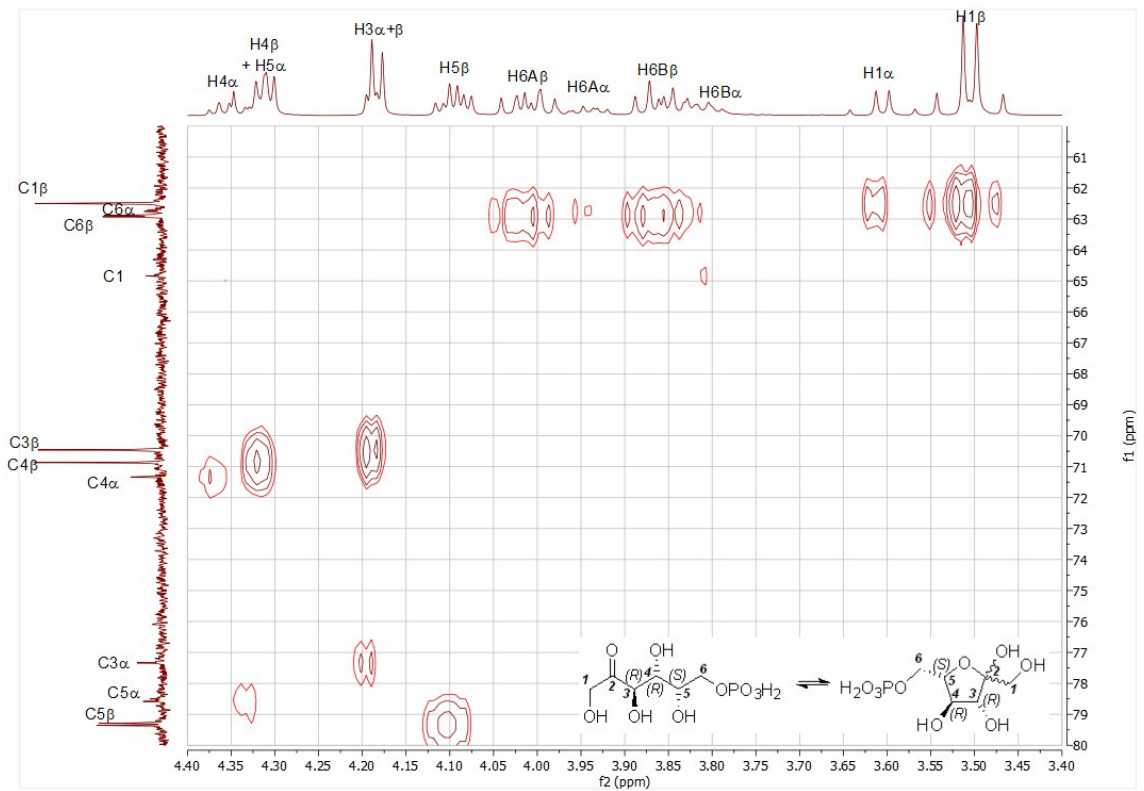

Table S3. DERA collection

| Uniprot ID | Organisms                                                                                                                                                                 | Strain used for PCR | Primer 5prim                                     | Primer 3prim                                    |
|------------|---------------------------------------------------------------------------------------------------------------------------------------------------------------------------|---------------------|--------------------------------------------------|-------------------------------------------------|
| A3DL3      | <i>Staphylothermus marinus</i> (strain ATCC 43588 / DSM 3639 / JCM 9404 / F1)                                                                                             | DSMZ-3639           | AAAGAAGGAGATAGGATCATGGGTGGTTCGCTTG               | GTGTAATGGATAGTGATCTAATTTCCCTCTTAACCTGATG        |
| A5FCJ8     | <i>Flavobacterium johnsoniae</i> (strain ATCC 17061 / DSM 2064 / UW101) ( <i>Cytophaga johnsonae</i> )                                                                    | DSMZ-2064           | AAAGAAGGAGATAGGATCATGTAATTTCCGCGCATTC            | GTGTAATGGATAGTGATCTAATATGATTTGGTATTTTCTC        |
| ASVHQ9     | <i>Lactobacillus reuteri</i> (strain DSM 20016)                                                                                                                           | DSMZ-20016          | AAAGAAGGAGATAGGATCATGAAGTAAACGCAAGCAATTAG        | GTGTAATGGATAGTGATCTAATTTGGTCCGCTCTTC            |
| A6H1F6     | <i>Flavobacterium psychrophilum</i> (strain JIP02/86 / ATCC 49511)                                                                                                        | DSMZ-21280          | AAAGAAGGAGATAGGATCATGAATATTAAGCAATATCTA          | GTGTAATGGATAGTGATCTAATAATTTCCAGCGCTAA           |
| A7HN67     | <i>Feridobacterium nodosum</i> (strain ATCC 35602 / DSM 5306 / R117-B1)                                                                                                   | DSMZ-5306           | AAAGAAGGAGATAGGATCATGGATTTGTTAAATTTGAGAAAGAAAG   | GTGTAATGGATAGTGATCTTAGCGTTTACTATGTAGTACCAG      |
| A8F3L9     | <i>Pseudothermotoga lettingae</i> (strain ATCC BAA-301 / DSM 14385 / NBRC 107922 / TMO) ( <i>Thermotoga lettingae</i> )                                                   | DSMZ-14385          | AAAGAAGGAGATAGGATCATGTTTAAAGTTTCCGAGAGGG         | GTGTAATGGATAGTGATCTACTCTCCCTAGCCTTTC            |
| A8MH18     | <i>Alkaliphilus oremlandii</i> (strain OhLAs) ( <i>Clostridium oremlandii</i> (strain OhLAs))                                                                             | DSMZ-21761          | AAAGAAGGAGATAGGATCATGAATATAGCAAAATATCATGCAC      | GTGTAATGGATAGTGATCTAATACCCCGCGGTATT             |
| A9BEN0     | <i>Petrogala mobilis</i> (strain DSM 10674 / S195)                                                                                                                        | DSMZ-10674          | AAAGAAGGAGATAGGATCATGAATAATTCAGAAATAGAAAAAG      | GTGTAATGGATAGTGATCTATATCTTCTGAAATCTTTAATC       |
| A9KKG9     | <i>Lochnoclostridium phytofermentans</i> (strain ATCC 700394 / DSM 18823 / ISdJ) ( <i>Clostridium phytofermentans</i> )                                                   | DSMZ-18823          | AAAGAAGGAGATAGGATCATGGCGCTAAAGCGCGGA             | GTGTAATGGATAGTGATCTAATAGCCGTTTCAGAGACTC         |
| B0SON1     | <i>Finegoldia magna</i> (strain ATCC 29328) ( <i>Peptostreptococcus magnus</i> )                                                                                          | ATCC-29328          | AAAGAAGGAGATAGGATCATGGAATTAATAATATATCG           | GTGTAATGGATAGTGATCTACTCTACTATTTTAAAT            |
| B1CSN8     | <i>Anaerofustis stercorihominis</i> DSM 17244                                                                                                                             | DSMZ-17244          | AAAGAAGGAGATAGGATCATGAAAAAGAAAGTAGATTTA          | GTGTAATGGATAGTGATCTAACCACTTAACTTTTTTTT          |
| B1C7X1     | <i>Anaerofustis stercorihominis</i> DSM 17244                                                                                                                             | DSMZ-17244          | AAAGAAGGAGATAGGATCATGAGAGATATAAGACCTTGAAAA       | GTGTAATGGATAGTGATCTAATTAAGTCTTTTATATCGCTG       |
| B1CV1      | <i>Anaerofustis stercorihominis</i> DSM 17244                                                                                                                             | DSMZ-17244          | AAAGAAGGAGATAGGATCATGATAACAAATATGAATTAGCAAG      | GTGTAATGGATAGTGATCTAATTTGCTGCTGGCTC             |
| B5YES7     | <i>Dictyoglomus thermophilum</i> (strain ATCC 35947 / DSM 3960 / H-6-12)                                                                                                  | DSMZ-3960           | AAAGAAGGAGATAGGATCATGAAGAGGTTAAAGAAAAAT          | GTGTAATGGATAGTGATCTACTCTAAGCTCATTTATATGTT       |
| B6FZ5      | <i>Clostridium</i> <i>hiranonis</i> DSM 13275                                                                                                                             | DSMZ-13275          | AAAGAAGGAGATAGGATCATGAAATTAACATAAAAAAGAG         | GTGTAATGGATAGTGATCTAATTTCTACTCTTTCAATTC         |
| B6WB70     | <i>Anaerococcus hydrogaelis</i> DSM 7454                                                                                                                                  | DSMZ-7454           | AAAGAAGGAGATAGGATCATGATTATAAGGAGAAAAA            | GTGTAATGGATAGTGATCTAATTTCTCCTTACTACTA           |
| B7CBX4     | <i>Haldemanella bififormis</i> DSM 3989                                                                                                                                   | DSMZ-3989           | AAAGAAGGAGATAGGATCATGAATAAATTTTTGATCATAC         | GTGTAATGGATAGTGATCTAATTTCTCCTACTTATATCA         |
| B7CCR8     | <i>Haldemanella bififormis</i> DSM 3989                                                                                                                                   | DSMZ-3989           | AAAGAAGGAGATAGGATCATGAACAAACACACACTCGC           | GTGTAATGGATAGTGATCTAATTTCTCGCTTCAAAATC          |
| B8I9D0     | <i>Clostridium cellulolyticum</i> (strain ATCC 35319 / DSM 5812 / JCM 6584 / H10)                                                                                         | DSMZ-5812           | AAAGAAGGAGATAGGATCATGGTTAACGATAAAAAAGGATTTG      | GTGTAATGGATAGTGATCTAATTTTGCATATCTTAAAC          |
| B9MKK9     | <i>Caldicellulosiruptor bescii</i> (strain ATCC BAA-1888 / DSM 6725 / Z-1320) ( <i>Anaerocellum thermophilum</i> )                                                        | DSMZ-6725           | AAAGAAGGAGATAGGATCATGATGACGAGAGAGAGATTG          | GTGTAATGGATAGTGATCTAATCTCCACAAATGCTAC           |
| C0EYB5     | <i>Eubacterium</i> <i>hallii</i> DSM 3353                                                                                                                                 | DSMZ-3353           | AAAGAAGGAGATAGGATCATGTTGATTTTCAAAGATT            | GTGTAATGGATAGTGATCTAATCTCTCTCATATGGA            |
| C0CF57     | <i>Persephonella marina</i> (strain DSM 14350 / EX-H1)                                                                                                                    | DSMZ-14350          | AAAGAAGGAGATAGGATCATGAAATTTGACTCAGACATGACAAAAAG  | GTGTAATGGATAGTGATCTAACCTTGCTTTTATAATATC         |
| C1DW64     | <i>Sulfurhydrogenibium azorense</i> (strain Az-Fu1 / DSM 15241 / OCM 825)                                                                                                 | DSMZ-15241          | AAAGAAGGAGATAGGATCATGACCTATGGTACGGATTTG          | GTGTAATGGATAGTGATCTAATTAAGTCTTCTTGGTCTTCTG      |
| C6A3K7     | <i>Thermococcus sibiricus</i> (strain MM 739 / DSM 12597)                                                                                                                 | DSMZ-12597          | AAAGAAGGAGATAGGATCATGAAATGTTCCAAATATATAGATCAC    | GTGTAATGGATAGTGATCTACTCGTTTTTGGCC               |
| C7N8Y8     | <i>Leptotrichia buccalis</i> (strain ATCC 14201 / DSM 1135 / JCM 12969 / NCTC 10249 / C-1013-b)                                                                           | DSMZ-1135           | AAAGAAGGAGATAGGATCATGTTAATGATAAAAAAATAACAAAT     | GTGTAATGGATAGTGATCTAATTTCTCAGTTTTTTCAC          |
| C7RF30     | <i>Anaerococcus prevotii</i> (strain ATCC 9321 / DSM 20548 / JCM 6508 / PC1) ( <i>Peptostreptococcus prevotii</i> ) ( <i>Peptococcus prevotii</i> )                       | DSMZ-20548          | AAAGAAGGAGATAGGATCATGAAAAAACAAGAAATCTACGCTC      | GTGTAATGGATAGTGATCTAATAATCTGACTTATTTTC          |
| D1BL34     | <i>Veillonella parvula</i> (strain ATCC 10790 / DSM 2008 / JCM 12972 / Te3) ( <i>Veillonella akalescens</i> )                                                             | DSMZ-2008           | AAAGAAGGAGATAGGATCATGTTGGTAAAGAAATTTAG           | GTGTAATGGATAGTGATCTAATCTCTCTTCAAGTGATTC         |
| D3DYY5     | <i>Methanobrevibacter ruminantium</i> (strain ATCC 35063 / DSM 1093 / JCM 13430 / OCM 146 / M1) ( <i>Methanobacterium ruminantium</i> )                                   | DSMZ-1093           | AAAGAAGGAGATAGGATCATGATACAGCAGAAAGAAATGAGCTC     | GTGTAATGGATAGTGATCTAATAAAGCTTGGGCTG             |
| D3PD71     | <i>Deferribacter desulfuricans</i> (strain DSM 14783 / JCM 11476 / NBRC 101012 / SSM1)                                                                                    | DSMZ-14783          | AAAGAAGGAGATAGGATCATGAATATGATAATTTTGTTCAGC       | GTGTAATGGATAGTGATCTATCCACATCATCTCTC             |
| D5DGD3     | <i>Bacillus megaterium</i> (strain DSM 319)                                                                                                                               | DSMZ-319            | AAAGAAGGAGATAGGATCATGAGTCAAAACATTACGGG           | GTGTAATGGATAGTGATCTAATAATCAGAGTTGCTTAATTGAC     |
| DSU8N7     | <i>Brachyspira murchisonii</i> (strain ATCC 51284 / DSM 12563 / 56-150) ( <i>Serpulina murchisonii</i> )                                                                  | DSMZ-12563          | AAAGAAGGAGATAGGATCATGAACATGATAAGTAAATTAATCG      | GTGTAATGGATAGTGATCTAATTTTCTGCAATTC              |
| D8G14      | <i>Clostridium ljungdahlii</i> (strain ATCC 55383 / DSM 13528 / PETC)                                                                                                     | DSMZ-13528          | AAAGAAGGAGATAGGATCATGAATATTTGCTAAAATGATTGACC     | GTGTAATGGATAGTGATCTAATCAGACATAAGTAATACCTGAC     |
| D8K119     | <i>Lactococcus lactis</i> subsp. <i>cremoris</i> (strain N29000)                                                                                                          | DSMZ-20069          | AAAGAAGGAGATAGGATCATGCAAAATTAATAATATATTGACCATAC  | GTGTAATGGATAGTGATCTTAGAGCTGCTAATGAGGTAAGAC      |
| D9SKJ3     | <i>Clostridium cellulovorans</i> (strain ATCC 35296 / DSM 3052 / OCM 3 / 7438)                                                                                            | DSMZ-3052           | AAAGAAGGAGATAGGATCATGAAAAATCAAAAATAGCA           | GTGTAATGGATAGTGATCTAATAATCGCTCTTCTTATGTTATC     |
| D9TPN8     | <i>Thermoanaerobacterium thermosaccharolyticum</i> (strain ATCC 7956 / DSM 571 / NCIB 9385 / NCA 3814) ( <i>Clostridium thermosaccharolyticum</i> )                       | DSMZ-571            | AAAGAAGGAGATAGGATCATGGAATTTGCAAAAATAATTTGATCATAC | GTGTAATGGATAGTGATCTAATTTGCAAAAATAATTTGATCATAC   |
| E05NU4     | <i>Ignisphaera aggregans</i> (strain DSM 17230 / JCM 13409 / AQ1.S1)                                                                                                      | DSMZ-17230          | AAAGAAGGAGATAGGATCATGGTTATCACCATAAACG            | GTGTAATGGATAGTGATCTAATCTAAGTATTTTCCAAAGATTTTT   |
| E2NRK0     | <i>Catenibacterium mitsuokai</i> (strain DSM 15897 / JCM 10609 / CIP 106738 / RCA14-39)                                                                                   | DSMZ-15897          | AAAGAAGGAGATAGGATCATGAAGAATATATCTATTGATGAATGGC   | GTGTAATGGATAGTGATCTAATAATCAATCACTCAACAGC        |
| E3DLZ8     | <i>Halanaerobium praevalens</i> (strain ATCC 33744 / DSM 2228 / G5L)                                                                                                      | DSMZ-2228           | AAAGAAGGAGATAGGATCATGAATAAGGAAGAAATTCAAAAAC      | GTGTAATGGATAGTGATCTAATAATCTGATCAGTACTTGACCTTC   |
| E3DQ67     | <i>Halanaerobium praevalens</i> (strain ATCC 33744 / DSM 2228 / G5L)                                                                                                      | DSMZ-2228           | AAAGAAGGAGATAGGATCATGGCGATTAACCTCGTGG            | GTGTAATGGATAGTGATCTAATTTCTCATCATCAGTAACA        |
| E3H811     | <i>Ilyobacter polytropus</i> (strain DSM 2926 / CuHbu1)                                                                                                                   | DSMZ-2926           | AAAGAAGGAGATAGGATCATGAAATCAACAAGTATATAGATCA      | GTGTAATGGATAGTGATCTAATTTCTCCTCTTTGGCC           |
| E3PT30     | <i>Acetooanaerobium sticklandii</i> (strain ATCC 12662 / DSM 519 / JCM 1433 / NCIMB 10654) ( <i>Clostridium sticklandii</i> )                                             | DSMZ-519            | AAAGAAGGAGATAGGATCATGAAAAATCTTTCTAGATAT          | GTGTAATGGATAGTGATCTAATAGCTGAAGACTGAGATTTTG      |
| E4TDN5     | <i>Riemerella anatipetifer</i> (strain ATCC 11845 / DSM 15868 / JCM 9532 / NCTC 11014)                                                                                    | DSMZ-15868          | AAAGAAGGAGATAGGATCATGAATAATGAAAAACTATC           | GTGTAATGGATAGTGATCTAGTATCTTCCCGAAGC             |
| E4TMX4     | <i>Marivirga tractuosa</i> (strain ATCC 23168 / DSM 4126 / NBRC 15989 / NCIMB 1408 / VKM B-1430 / H-43) ( <i>Microsilla tractuosa</i> ) ( <i>Flexibacter tractuosus</i> ) | DSMZ-4126           | AAAGAAGGAGATAGGATCATGAATAATCAAAAAATCATTGAGC      | GTGTAATGGATAGTGATCTAGATCTTTTCAAAATTCAGGACC      |
| E6TW33     | <i>Bacillus cellulosilyticus</i> (strain ATCC 21833 / DSM 2522 / FERM P-1141 / JCM 9156 / N-4)                                                                            | DSMZ-2522           | AAAGAAGGAGATAGGATCATGACTACTCAAAATCTGTG           | GTGTAATGGATAGTGATCTAATATGTTTCAGTCCCTTTTTTC      |
| F2JSP1     | <i>Cellulosilyticum lentocellum</i> (strain ATCC 49066 / DSM 5427 / NCIMB 11756 / RHMS) ( <i>Clostridium lentocellum</i> )                                                | DSMZ-5427           | AAAGAAGGAGATAGGATCATGAACATTTCAAAACAAATTGAC       | GTGTAATGGATAGTGATCTAGTAAGAACCATCATCTGTTACTTTTTG |
| G2PMV9     | <i>Muricauda ruestringensis</i> (strain DSM 13258 / CIP 107369 / LMG 19739 / B1)                                                                                          | DSMZ-13258          | AAAGAAGGAGATAGGATCATGCTTTTGAAAAATATATAGATCAC     | GTGTAATGGATAGTGATCTAATGATTAAGAAGGCTCCTG         |
| G4LF32     | <i>Tetragenococcus halophilus</i> (strain DSM 20338 / JCM 20259 / NCIMB 9735 / NBRC 12172) ( <i>Pediococcus halophilus</i> )                                              | DSMZ-20338          | AAAGAAGGAGATAGGATCATGGAATTAATCGTATAATCGAC        | GTGTAATGGATAGTGATCTATCCATCTCTTTTCCGCTTTG        |
| G4LSP7     | <i>Tetragenococcus halophilus</i> (strain DSM 20338 / JCM 20259 / NCIMB 9735 / NBRC 12172) ( <i>Pediococcus halophilus</i> )                                              | DSMZ-20338          | AAAGAAGGAGATAGGATCATGACATTAATAAAAAAGAAAG         | GTGTAATGGATAGTGATCTAAGCTAAAATTTCTTCTGCTG        |
| G4L7G6     | <i>Tetragenococcus halophilus</i> (strain DSM 20338 / JCM 20259 / NCIMB 9735 / NBRC 12172) ( <i>Pediococcus halophilus</i> )                                              | DSMZ-20338          | AAAGAAGGAGATAGGATCATGACGATAAATTAACGG             | GTGTAATGGATAGTGATCTAATCTGCTGCTGATAC             |

|               |                                                                                                                                                      |                |                                              |                                              |
|---------------|------------------------------------------------------------------------------------------------------------------------------------------------------|----------------|----------------------------------------------|----------------------------------------------|
| H2J323        | <i>Mariniflaga piezophila</i> (strain DSM 14283 / JCM 11233 / KA3)                                                                                   | DSMZ-14283     | AAAGAAGGAGATAGGATCATGGACTAAAAAATATCAT        | GTGTAATGGATAGTATCTTAATCCAGTACCTTCAGCTTTTCG   |
| H6LFY1        | <i>Acetobacterium woodii</i> (strain ATCC 29683 / DSM 1030 / JCM 2381 / KCTC 1655 / WB1)                                                             | DSMZ-1030      | AAAGAAGGAGATAGGATCATGGATTTAGTATTAACCGGTAAGAA | GTGTAATGGATAGTATCTTAATTAACCTCAAGCTTTTCG      |
| P44430        | <i>Haemophilus influenzae</i> (strain ATCC 51907 / DSM 11121 / KW20 / Rd)                                                                            | DSMZ-11121     | AAAGAAGGAGATAGGATCATGATCAAACTCACTTGCTC       | GTGTAATGGATAGTATCTTAGTAAGCTTTGAGTGTCTTG      |
| Q5X5D2        | <i>Legionella pneumophila</i> (strain Paris)                                                                                                         | Pasteur-PARIS  | AAAGAAGGAGATAGGATCATGATTTGGATAAGCAATT        | GTGTAATGGATAGTATCTTAAGCAATAATTTCAAGCAG       |
| Q81EY8        | <i>Bacillus cereus</i> (strain ATCC 14579 / DSM 31 / JCM 2152 / NBRC 15305 / NCIMB 9373 / NRRL B-3711)                                               | DSMZ-31        | AAAGAAGGAGATAGGATCATGAACTTCAAGTAAAT          | GTGTAATGGATAGTATCTTAGTAGTATCTGATGACACCTTTTCG |
| Q8E2U1        | <i>Streptococcus agalactiae</i> serotype III (strain NEM316)                                                                                         | Pasteur-NEM316 | AAAGAAGGAGATAGGATCATGGAAGTAAAGATATTTTA       | GTGTAATGGATAGTATCTTAATAGTGCCTTCTCAACTTTTCG   |
| Q9AIP7        | <i>Streptococcus mutans</i>                                                                                                                          | DSMZ-20523     | AAAGAAGGAGATAGGATCATGAAATCAATCAATATATTG      | GTGTAATGGATAGTATCTTAATTAACCTGTTGTTGCTTTTCG   |
| 247-24-30008  | <i>Anaerobic digester</i>                                                                                                                            | Digester       | AAAGAAGGAGATAGGATCATGAAAGCTTAAAGCAATG        | GTGTAATGGATAGTATCTTAAGCAATAATTTCAAGCAG       |
| 288-51-61502  | <i>Anaerobic digester</i>                                                                                                                            | Digester       | AAAGAAGGAGATAGGATCATGAAAGCTTAAAGCAATG        | GTGTAATGGATAGTATCTTAAGCAATAATTTCAAGCAG       |
| 3417-3-2646   | <i>Anaerobic digester</i>                                                                                                                            | Digester       | AAAGAAGGAGATAGGATCATGAAAGCTTAAAGCAATG        | GTGTAATGGATAGTATCTTAAGCAATAATTTCAAGCAG       |
| 4508-24-21936 | <i>Anaerobic digester</i>                                                                                                                            | Digester       | AAAGAAGGAGATAGGATCATGAAAGCTTAAAGCAATG        | GTGTAATGGATAGTATCTTAAGCAATAATTTCAAGCAG       |
| 4981-6-2647   | <i>Anaerobic digester</i>                                                                                                                            | Digester       | AAAGAAGGAGATAGGATCATGAAAGCTTAAAGCAATG        | GTGTAATGGATAGTATCTTAAGCAATAATTTCAAGCAG       |
| 506-20-27854  | <i>Anaerobic digester</i>                                                                                                                            | Digester       | AAAGAAGGAGATAGGATCATGAAAGCTTAAAGCAATG        | GTGTAATGGATAGTATCTTAAGCAATAATTTCAAGCAG       |
| 5924-5-2218   | <i>Anaerobic digester</i>                                                                                                                            | Digester       | AAAGAAGGAGATAGGATCATGAAAGCTTAAAGCAATG        | GTGTAATGGATAGTATCTTAAGCAATAATTTCAAGCAG       |
| 7061-2-531    | <i>Anaerobic digester</i>                                                                                                                            | Digester       | AAAGAAGGAGATAGGATCATGAAAGCTTAAAGCAATG        | GTGTAATGGATAGTATCTTAAGCAATAATTTCAAGCAG       |
| A11HNM9       | <i>Thermosinus carboxydivorans</i> Nor1                                                                                                              | DSMZ-14886     | AAAGAAGGAGATAGGATCATGGGAAAGGGAGGCTTCTG       | GTGTAATGGATAGTATCTTAAGCAATAATTTCAAGCAG       |
| A1R1U26       | <i>Pyrobaculum islandicum</i> (strain DSM 4184 / JCM 9189 / GEO3)                                                                                    | DSMZ-4184      | AAAGAAGGAGATAGGATCATGATCAATTAAGTCAATCCG      | GTGTAATGGATAGTATCTTAAGCAATAATTTCAAGCAG       |
| A28LE9        | <i>Hyperthermus butylicus</i> (strain DSM 5456 / JCM 9403 / PLM1-5)                                                                                  | DSMZ-5456      | AAAGAAGGAGATAGGATCATGATCAATTAAGTCAATCCG      | GTGTAATGGATAGTATCTTAAGCAATAATTTCAAGCAG       |
| A3DF70        | <i>Clostridium thermocellum</i> (strain ATCC 27405 / DSM 1237 / NBRC 103400 / NCIMB 10682 / NRRL B-4536 / VPI 7372) (Ruminiclostridium thermocellum) | DSMZ-1237      | AAAGAAGGAGATAGGATCATGAAAGGATGAAAGTATTTGG     | GTGTAATGGATAGTATCTTAAGCAATAATTTCAAGCAG       |
| A3DGT2        | <i>Clostridium thermocellum</i> (strain ATCC 27405 / DSM 1237 / NBRC 103400 / NCIMB 10682 / NRRL B-4536 / VPI 7372) (Ruminiclostridium thermocellum) | DSMZ-1237      | AAAGAAGGAGATAGGATCATGAAAGGATGAAAGTATTTGG     | GTGTAATGGATAGTATCTTAAGCAATAATTTCAAGCAG       |
| A3DGT3        | <i>Shewanella loihica</i> (strain ATCC BAA-1088 / PV-4)                                                                                              | DSMZ-17748     | AAAGAAGGAGATAGGATCATGATGATTTAAAAAAGC         | GTGTAATGGATAGTATCTTAGTAAGCTTGAAGCCCTTAG      |
| A4AQJ5        | <i>Blastopirellula marina</i> DSM 3645                                                                                                               | DSMZ-3645      | AAAGAAGGAGATAGGATCATGATGATTTAAAAAAGC         | GTGTAATGGATAGTATCTTAGTAAGCTTGAAGCCCTTAG      |
| A4AQJ5        | <i>Blastopirellula marina</i> DSM 3645                                                                                                               | DSMZ-3645      | AAAGAAGGAGATAGGATCATGATGATTTAAAAAAGC         | GTGTAATGGATAGTATCTTAGTAAGCTTGAAGCCCTTAG      |
| A5EY74        | <i>Dichelobacter nodosus</i> (strain VCS1703A)                                                                                                       | DSMZ-20708     | AAAGAAGGAGATAGGATCATGATCAATCTGCAAAATTTCAAC   | GTGTAATGGATAGTATCTTAAGCAATAATTTCAAGCAG       |
| A6LG64        | <i>Parabacteroides distansus</i> (strain ATCC 8503 / DSM 20701 / CIP 104284 / JCM 5825 / NCTC 11152)                                                 | DSMZ-20701     | AAAGAAGGAGATAGGATCATGGACATCATCACGATT         | GTGTAATGGATAGTATCTTAATTCGAGCTGTTTTTCG        |
| A7NNM6        | <i>Roseiflexus costenholzii</i> (strain DSM 13941 / HLO8)                                                                                            | DSMZ-13941     | AAAGAAGGAGATAGGATCATGGATTTGCAACGATGATG       | GTGTAATGGATAGTATCTTAATTCGAGCTGTTTTTCG        |
| A7VSD0        | <i>Clostridium leptum</i> DSM 753                                                                                                                    | DSMZ-753       | AAAGAAGGAGATAGGATCATGAACTAAACCAATACATCGACC   | GTGTAATGGATAGTATCTTAATTCGAGCAATTTGAACAGAGCG  |
| A7VWB3        | <i>Clostridium leptum</i> DSM 753                                                                                                                    | DSMZ-753       | AAAGAAGGAGATAGGATCATGAACTAAACCAATACATCGACC   | GTGTAATGGATAGTATCTTAATTCGAGCAATTTGAACAGAGCG  |
| A8RFU5        | <i>Absiella dolichum</i> DSM 3991                                                                                                                    | DSMZ-3991      | AAAGAAGGAGATAGGATCATGAAATTAATTAATATATTGATC   | GTGTAATGGATAGTATCTTAAGTATTGATCAACTTAACCCCG   |
| A8RNT5        | <i>Clostridium bolteae</i> (strain ATCC BAA-613 / WAL 16351)                                                                                         | DSMZ-15670     | AAAGAAGGAGATAGGATCATGGTTCAGCGCCGCAATG        | GTGTAATGGATAGTATCTTAAGTATTGATCAACTTAACCCCG   |
| A8RSU8        | <i>Clostridium bolteae</i> (strain ATCC BAA-613 / WAL 16351)                                                                                         | DSMZ-15670     | AAAGAAGGAGATAGGATCATGGTTCAGCGCCGCAATG        | GTGTAATGGATAGTATCTTAAGTATTGATCAACTTAACCCCG   |
| A8S319        | <i>Clostridium bolteae</i> (strain ATCC BAA-613 / WAL 16351)                                                                                         | DSMZ-15670     | AAAGAAGGAGATAGGATCATGGTTCAGCGCCGCAATG        | GTGTAATGGATAGTATCTTAAGTATTGATCAACTTAACCCCG   |
| B0MAA8        | <i>Anaerostipes caccae</i> DSM 14662                                                                                                                 | DSMZ-14662     | AAAGAAGGAGATAGGATCATGGAAATGGAATTTGAACAC      | GTGTAATGGATAGTATCTTAAGTATTGATCAACTTAACCCCG   |
| B0MAE3        | <i>Anaerostipes caccae</i> DSM 14662                                                                                                                 | DSMZ-14662     | AAAGAAGGAGATAGGATCATGGAAATGGAATTTGAACAC      | GTGTAATGGATAGTATCTTAAGTATTGATCAACTTAACCCCG   |
| B0MET2        | <i>Anaerostipes caccae</i> DSM 14662                                                                                                                 | DSMZ-14662     | AAAGAAGGAGATAGGATCATGGAAATGGAATTTGAACAC      | GTGTAATGGATAGTATCTTAAGTATTGATCAACTTAACCCCG   |
| B0MYI8        | <i>Alistipes putredinis</i> DSM 17216                                                                                                                | DSMZ-17216     | AAAGAAGGAGATAGGATCATGGAATACGGCAATTTGAAGG     | GTGTAATGGATAGTATCTTAAGAAATTTGACTTCCCG        |
| B0NSF0        | <i>Bacteroides stercoris</i> ATCC 43183                                                                                                              | DSMZ-19555     | AAAGAAGGAGATAGGATCATGGAGAAATACGAACTTACACAG   | GTGTAATGGATAGTATCTTAAGAAATTTGACTTCCCG        |
| B0PFM5        | <i>Anaerotruncus callihominis</i> DSM 17241                                                                                                          | DSMZ-17241     | AAAGAAGGAGATAGGATCATGGAGAAATTTGACTTCCCG      | GTGTAATGGATAGTATCTTAAGAAATTTGACTTCCCG        |
| B0PH1A        | <i>Anaerotruncus callihominis</i> DSM 17241                                                                                                          | DSMZ-17241     | AAAGAAGGAGATAGGATCATGGAGAAATTTGACTTCCCG      | GTGTAATGGATAGTATCTTAAGAAATTTGACTTCCCG        |
| B1HTK8        | <i>Lysinibacillus sphaericus</i> (strain C3-41)                                                                                                      | DSMZ-1866      | AAAGAAGGAGATAGGATCATGGAACAAAATTTTGCCG        | GTGTAATGGATAGTATCTTAATAATAGAACTGCTGAT        |
| B1YK77        | <i>Exiguobacterium sibiricum</i> (strain DSM 17290 / JCM 13490 / 255-15)                                                                             | DSMZ-17290     | AAAGAAGGAGATAGGATCATGAAATTTGACGGAATGATCG     | GTGTAATGGATAGTATCTTAGTATGCTGCTGCAAGTTCC      |
| B3QZ00        | <i>Chloroherpeton thalassium</i> (strain ATCC 35110 / GB-78)                                                                                         | ATCC-35110     | AAAGAAGGAGATAGGATCATGAAATTTGACGGAATGATCG     | GTGTAATGGATAGTATCTTAGTATGCTGCTGCAAGTTCC      |
| B5CJ41        | <i>Bacteroides plebeius</i> (strain DSM 17135 / JCM 12973 / M2)                                                                                      | DSMZ-17135     | AAAGAAGGAGATAGGATCATGAAATTTGACGGAATGATCG     | GTGTAATGGATAGTATCTTAGTATGCTGCTGCAAGTTCC      |
| B7B6E0        | <i>Parabacteroides johnsonii</i> DSM 18315                                                                                                           | DSMZ-18315     | AAAGAAGGAGATAGGATCATGATACGAAACGATGATG        | GTGTAATGGATAGTATCTTAATTTCCCAACGGTGTTC        |
| B7GMN1        | <i>Anoxybacillus flavithermus</i> (strain DSM 21510 / WK1)                                                                                           | DSMZ-21510     | AAAGAAGGAGATAGGATCATGATGAACTTAAAGCAATG       | GTGTAATGGATAGTATCTTAAGTATTGCTGTTGATG         |
| B8CX10        | <i>Halothermothrix orenii</i> (strain H 168 / OCM 544 / DSM 9562)                                                                                    | DSMZ-9562      | AAAGAAGGAGATAGGATCATGCAATCAAACTCTGCTG        | GTGTAATGGATAGTATCTTAATCTTATCCCGCTCATC        |
| B8FLK9        | <i>Desulfitobacterium hafniense</i> (strain DCB-2 / DSM 10664)                                                                                       | DSMZ-10664     | AAAGAAGGAGATAGGATCATGAAACCAATGAATGACGAG      | GTGTAATGGATAGTATCTTAACCTGATTTATTTGACAGC      |
| B9Y926        | <i>Haldemanella filiformis</i> DSM 12042                                                                                                             | DSMZ-12042     | AAAGAAGGAGATAGGATCATGAAACCAATGAATGACGAG      | GTGTAATGGATAGTATCTTAACCTGATTTATTTGACAGC      |
| B9YB21        | <i>Haldemanella filiformis</i> DSM 12042                                                                                                             | DSMZ-12042     | AAAGAAGGAGATAGGATCATGAAACCAATGAATGACGAG      | GTGTAATGGATAGTATCTTAACCTGATTTATTTGACAGC      |
| C0C305        | <i>Clostridium hylemonae</i> DSM 15053                                                                                                               | DSMZ-15053     | AAAGAAGGAGATAGGATCATGGACCAAAACTTACACCC       | GTGTAATGGATAGTATCTTAACAGTGAACGGATG           |

|        |                                                                                                                                                                       |            |                                                |                                             |
|--------|-----------------------------------------------------------------------------------------------------------------------------------------------------------------------|------------|------------------------------------------------|---------------------------------------------|
| C0C3B7 | <i>[Clostridium] hylemonae</i> DSM 15053                                                                                                                              | DSMZ-15053 | AAAGAAGGAGATAGGATCATGAAATAGAGAAATATTAAGAC      | GTGTAATGGATAGTACTTAATCAAGCACTCTCTTCG        |
| C0CND6 | <i>Blautia hydrogenotrophica</i> DSM 10507                                                                                                                            | DSMZ-10507 | AAAGAAGGAGATAGGATCATGGAAAGAGAAATTTAAAGAA       | GTGTAATGGATAGTACTTATCTTCAACAAATGAATCAATC    |
| C0CZD0 | <i>[Clostridium] asparagiforme</i> DSM 15981                                                                                                                          | DSMZ-15981 | AAAGAAGGAGATAGGATCATGCAATGAAGAGATGTTG          | GTGTAATGGATAGTACTTAATCGCCGACCTGGTTC         |
| C0D9N4 | <i>[Clostridium] asparagiforme</i> DSM 15981                                                                                                                          | DSMZ-15981 | AAAGAAGGAGATAGGATCATGTTTATAAAGTCTTGAGTTGG      | GTGTAATGGATAGTACTTAATCGCCAGCTGCTCTG         |
| C0DA78 | <i>[Clostridium] asparagiforme</i> DSM 15981                                                                                                                          | DSMZ-15981 | AAAGAAGGAGATAGGATCATGCAACGAGAAATCTTTCAG        | GTGTAATGGATAGTACTTAACCTGTTTCTCCG            |
| C0W0V9 | <i>Actinomyces coelecanis</i> DSM 15436                                                                                                                               | DSMZ-15436 | AAAGAAGGAGATAGGATCATGACCAACTCAGCAAAATACG       | GTGTAATGGATAGTACTTAAGTTCTTCCAGGAGATTG       |
| C0W106 | <i>Actinomyces coelecanis</i> DSM 15436                                                                                                                               | DSMZ-15436 | AAAGAAGGAGATAGGATCATGAAAGGCGGAGATAGC           | GTGTAATGGATAGTACTTAATCGCAGATCAGCCAAATC      |
| C0WZ11 | <i>Lactobacillus fermentum</i> ATCC 14931                                                                                                                             | DSMZ-20052 | AAAGAAGGAGATAGGATCATGAAATTAATAACTACATTGACCAC   | GTGTAATGGATAGTACTTAATGCTTACCCGATGATGG       |
| C0X8W3 | <i>Enterococcus faecalis</i> TX0104                                                                                                                                   | DSMZ-20478 | AAAGAAGGAGATAGGATCATGAAATTAACCCGATGATTG        | GTGTAATGGATAGTACTTAATCCCTCCGACATTG          |
| C3PI20 | <i>Corynebacterium aurimucosum</i> (strain ATCC 700975 / DSM 44827 / CN-1) ( <i>Corynebacterium nigricans</i> )                                                       | DSMZ-44827 | AAAGAAGGAGATAGGATCATGCTCCCTGACTGACG            | GTGTAATGGATAGTACTTAACCTCCAGCCCTC            |
| C4LAZ1 | <i>Tolmanosaurus auensis</i> (strain DSM 9187 / TA4)                                                                                                                  | DSMZ-9187  | AAAGAAGGAGATAGGATCATGCTGATTACAACAGCGG          | GTGTAATGGATAGTACTTAATCCCTGATGATCGGG         |
| C4LX4  | <i>Corynebacterium kroppenstedtii</i> (strain DSM 44385 / JCM 11950 / CIP 105744 / CCUG 35717)                                                                        | DSMZ-44385 | AAAGAAGGAGATAGGATCATGCTACTACGCCAGACAG          | GTGTAATGGATAGTACTTAAGAACCCGCTGCTGAC         |
| C6LJ8  | <i>Marvinbryantia formatexiensis</i> DSM 14469                                                                                                                        | DSMZ-14469 | AAAGAAGGAGATAGGATCATGAAAGCAAGGAAATGTTG         | GTGTAATGGATAGTACTTAATCACTCCGCTCTCTG         |
| C7PV91 | <i>Chitinophaga pinensis</i> (strain ATCC 43595 / DSM 2588 / NCIB 11800 / UQM 2034)                                                                                   | DSMZ-2588  | AAAGAAGGAGATAGGATCATGAACTCAACAGATACATCGAC      | GTGTAATGGATAGTACTTAATCACTCCGCTCTCTG         |
| C7R2C3 | <i>Jonedia denitrificans</i> (strain ATCC 14870 / DSM 20603 / CIP 55134) ( <i>Listeria denitrificans</i> )                                                            | DSMZ-20603 | AAAGAAGGAGATAGGATCATGCGAGAAAGTACTGCTG          | GTGTAATGGATAGTACTTAGTAAACCCGACCTGAC         |
| C7REE6 | <i>Anaerococcus prevotii</i> (strain ATCC 9321 / DSM 20548 / JCM 6508 / PC1) ( <i>Peptostreptococcus prevotii</i> ) ( <i>Peptococcus prevotii</i> )                   | DSMZ-20548 | AAAGAAGGAGATAGGATCATGAAAAAATAAATCATATATAG      | GTGTAATGGATAGTACTTACTCTTCAAAATCAATGACTTAC   |
| C8W218 | <i>Desulfotomaculum acetoxidans</i> (strain ATCC 49208 / DSM 771 / VKM B-1644) ( <i>Desulfofarctimon acetoxidans</i> )                                                | DSMZ-771   | AAAGAAGGAGATAGGATCATGAAATAACAACAAACAATG        | GTGTAATGGATAGTACTTAATCCATCTGCTGATGATTTTC    |
| C8W8Y2 | <i>Atopobium parvulum</i> (strain ATCC 33793 / DSM 20469 / JCM 10300 / VPI 0546) ( <i>Streptococcus parvulus</i> ) ( <i>Peptostreptococcus parvulus</i> )             | DSMZ-20469 | AAAGAAGGAGATAGGATCATGAAATCAACGGCCTTATC         | GTGTAATGGATAGTACTTACTCGTGACAAATAGCA         |
| C9LPE9 | <i>Dialister invisus</i> DSM 15470                                                                                                                                    | DSMZ-15470 | AAAGAAGGAGATAGGATCATGAAATCAACGGGAAAC           | GTGTAATGGATAGTACTTACAGAGAAATGTGCGGG         |
| D1PG70 | <i>Prevotella copri</i> DSM 18205                                                                                                                                     | DSMZ-18205 | AAAGAAGGAGATAGGATCATGACGATTAAGAAACAGG          | GTGTAATGGATAGTACTTAAAGATCTTGAATTTCTGCTCC    |
| D2R096 | <i>Pirellula staleyii</i> (strain ATCC 27377 / DSM 6068 / ICPB 4128) ( <i>Pirella staleyii</i> )                                                                      | DSMZ-6068  | AAAGAAGGAGATAGGATCATGCCACTATACCGTTGC           | GTGTAATGGATAGTACTTAAACGCCAGCTGCTAAG         |
| D2Z780 | <i>Dethiosulfobium peptidovorans</i> DSM 11002                                                                                                                        | DSMZ-11002 | AAAGAAGGAGATAGGATCATGGATTTGTCGGGAT             | GTGTAATGGATAGTACTTAAACCCGCGGAGCTG           |
| D3AD21 | <i>Hungateella hathewayi</i> DSM 13479                                                                                                                                | DSMZ-13479 | AAAGAAGGAGATAGGATCATGTAAGGAGAAACAAATGAAACG     | GTGTAATGGATAGTACTTACTACTTCAATAATCTTCAACAATC |
| D3AF28 | <i>Hungateella hathewayi</i> DSM 13479                                                                                                                                | DSMZ-13479 | AAAGAAGGAGATAGGATCATGGAACCAACTGAATATTGACAG     | GTGTAATGGATAGTACTTACTCTCCAGCAGATG           |
| D3AHT8 | <i>Hungateella hathewayi</i> DSM 13479                                                                                                                                | DSMZ-13479 | AAAGAAGGAGATAGGATCATGAAATAACAAGATAAGATGATCATCG | GTGTAATGGATAGTACTTACTTCCAAAGGAGCAG          |
| D3AAQ5 | <i>Hungateella hathewayi</i> DSM 13479                                                                                                                                | DSMZ-13479 | AAAGAAGGAGATAGGATCATGATTTATGACATATTTCTGA       | GTGTAATGGATAGTACTTACTTCTGAGCTGCGCAC         |
| D3AT22 | <i>Hungateella hathewayi</i> DSM 13479                                                                                                                                | DSMZ-13479 | AAAGAAGGAGATAGGATCATGGAATAATGGGAAGGTATC        | GTGTAATGGATAGTACTTAACTCTTCTCCAGC            |
| D3DH69 | <i>Hydrogenobacter thermophilus</i> (strain DSM 6534 / IAM 12695 / TK-6)                                                                                              | DSMZ-6534  | AAAGAAGGAGATAGGATCATGATAAAACAGCTACATAGACC      | GTGTAATGGATAGTACTTACTCTTTTAAAGTATGTCGAAGGTG |
| D4BZ48 | <i>Providencia rettgeri</i> DSM 1131                                                                                                                                  | DSMZ-1131  | AAAGAAGGAGATAGGATCATGGAACACTTGAACAAATA         | GTGTAATGGATAGTACTTACTAGTACTCTGCTGTTGG       |
| D4E8M0 | <i>Serratia odorifera</i> DSM 4582                                                                                                                                    | DSMZ-4582  | AAAGAAGGAGATAGGATCATGATTTGAAACAACTTGACTACGCTC  | GTGTAATGGATAGTACTTAACTGACTCCGCGGACG         |
| D4RYH7 | <i>Butyrivibrio crossotus</i> DSM 2876                                                                                                                                | DSMZ-2876  | AAAGAAGGAGATAGGATCATGGAATTAATAAGAAATTTGCGG     | GTGTAATGGATAGTACTTACTTCTTCTTCTTCTTCTTCTTCTT |
| D5EH29 | <i>Carolinomargarita akajimensis</i> (strain DSM 45221 / IAM 15411 / JCM 23193 / KCTC 12865 / O4OKA010-24)                                                            | DSMZ-45221 | AAAGAAGGAGATAGGATCATGCACTGACAACTG              | GTGTAATGGATAGTACTTAACTGACTGACATGAC          |
| D6XYK2 | <i>Bacillus selenitireducens</i> (strain ATCC 700615 / DSM 15326 / MLS10)                                                                                             | DSMZ-15326 | AAAGAAGGAGATAGGATCATGATCAATCCATTCGCAACG        | GTGTAATGGATAGTACTTAACTGACTTCTGCTTCTTCCACC   |
| D7BJY9 | <i>Arcanobacterium haemolyticum</i> (strain ATCC 9345 / DSM 20595 / NBRC 15585 / NCTC 8452 / 11018)                                                                   | DSMZ-20595 | AAAGAAGGAGATAGGATCATGGCAACACGCTGAAGAAAG        | GTGTAATGGATAGTACTTACTTGGGAGCAATCC           |
| D7LWC5 | <i>Listeria grayi</i> DSM 20601                                                                                                                                       | DSMZ-20601 | AAAGAAGGAGATAGGATCATGAACTGATTGACTTGAACG        | GTGTAATGGATAGTACTTATGCTGCTTCTCCCACTC        |
| D9PX57 | <i>Methanothermobacter marburgensis</i> (strain ATCC BAA-927 / DSM 2133 / JCM 14651 / NBRC 100331 / OCM 82 / Marburg) ( <i>Methanobacterium thermoautotrophicum</i> ) | DSMZ-2133  | AAAGAAGGAGATAGGATCATGAAGTTGAAACAGCAGAG         | GTGTAATGGATAGTACTTACTCCACCCCTCCAT           |
| D9QVA9 | <i>Acetohalobium arabaticum</i> (strain ATCC 49924 / DSM 5501 / Z-7288)                                                                                               | DSMZ-5501  | AAAGAAGGAGATAGGATCATGGCAATTAACCCGAAAG          | GTGTAATGGATAGTACTTATCTTCTTCTTCTTCTTCTC      |
| D9R027 | <i>Clostridium saccharolyticum</i> (strain ATCC 35040 / DSM 2544 / NRCC 2533 / WM1)                                                                                   | DSMZ-2544  | AAAGAAGGAGATAGGATCATGAATTTGCAAAAATGGTG         | GTGTAATGGATAGTACTTAAACAAGCGAATCCATG         |
| D9R1L8 | <i>Clostridium saccharolyticum</i> (strain ATCC 35040 / DSM 2544 / NRCC 2533 / WM1)                                                                                   | DSMZ-2544  | AAAGAAGGAGATAGGATCATGGAATAACGAACATTAGCC        | GTGTAATGGATAGTACTTACATGCGGTTTTAAGCTC        |
| D9R235 | <i>Thermosediminibacter oceani</i> (strain ATCC BAA-1034 / DSM 16646 / JW/1W-1228P)                                                                                   | DSMZ-16646 | AAAGAAGGAGATAGGATCATGTTTCAAGAGAACAGCTGGC       | GTGTAATGGATAGTACTTACTTAACTCTTATAATGGCCACG   |
| E0NU04 | <i>Prevotella marshii</i> DSM 16973 = JCM 13450                                                                                                                       | DSMZ-16973 | AAAGAAGGAGATAGGATCATGGCAATAACAACAAATCAT        | GTGTAATGGATAGTACTTAAAGAACTGGTTCTCTG         |
| E1M465 | <i>Streptococcus mitis</i> NCTC 12261                                                                                                                                 | DSMZ-12643 | AAAGAAGGAGATAGGATCATGAAATTAATAAATATATCGATC     | GTGTAATGGATAGTACTTAACTGACTCCCATCAGCC        |
| E1R2M2 | <i>Sediminispirochaeta smaragdinae</i> (strain DSM 11293 / JCM 15392 / SEBR 4228) ( <i>Spirochaeta smaragdinae</i> )                                                  | DSMZ-11293 | AAAGAAGGAGATAGGATCATGATAAGAAAGAACTTGC          | GTGTAATGGATAGTACTTAACTGACTCTTCCAACTTCAAC    |
| E1R7K7 | <i>Sediminispirochaeta smaragdinae</i> (strain DSM 11293 / JCM 15392 / SEBR 4228) ( <i>Spirochaeta smaragdinae</i> )                                                  | DSMZ-11293 | AAAGAAGGAGATAGGATCATGATACGACCCAGCAGC           | GTGTAATGGATAGTACTTATCTTCTTCAAGGACTCCGCG     |
| E1R9R0 | <i>Sediminispirochaeta smaragdinae</i> (strain DSM 11293 / JCM 15392 / SEBR 4228) ( <i>Spirochaeta smaragdinae</i> )                                                  | DSMZ-11293 | AAAGAAGGAGATAGGATCATGAAAAAGCAAGAACTTG          | GTGTAATGGATAGTACTTATTCGCTCCAGCAGAT          |
| E1UTS4 | <i>Bacillus amyloliquefaciens</i> (strain ATCC 23350 / DSM 7 / BCRC 11601 / OS NBRC 15535 / NRRL B-14393)                                                             | DSMZ-7     | AAAGAAGGAGATAGGATCATGCAATGCAAGTCAATAGACATAC    | GTGTAATGGATAGTACTTAACTGACTGCTGCTGC          |
| E1VTU5 | <i>Glutamicobacter arilaitensis</i> (strain DSM 16368 / CIP 108037 / IAM 15318 / JCM 13566 / Re117) ( <i>Arthrobacter arilaitensis</i> )                              | DSMZ-16368 | AAAGAAGGAGATAGGATCATGCACTAAAGCGCC              | GTGTAATGGATAGTACTTAACTGACTGAAACCGCTTGG      |
| E1X340 | <i>Halobacteriovorax marinus</i> (strain ATCC BAA-682 / DSM 15412 / SJ) ( <i>Bacteriovorax marinus</i> )                                                              | DSMZ-15412 | AAAGAAGGAGATAGGATCATGAAAGACTAAATAGATA          | GTGTAATGGATAGTACTTAACTGACTTCTTCTTCTCTC      |
| E4HP27 | <i>[Propionibacterium] humerusii</i> HLO44PA1                                                                                                                         | DSMZ-16379 | AAAGAAGGAGATAGGATCATGACATTAACGCTCTCATC         | GTGTAATGGATAGTACTTAACTGACTGAGGAGCGAG        |
| E4T6I7 | <i>Paladibacter propionicigenes</i> (strain DSM 17365 / JCM 13257 / WB4)                                                                                              | DSMZ-17365 | AAAGAAGGAGATAGGATCATGCAAAATTTGACGACC           | GTGTAATGGATAGTACTTAAACAAATCTTGAATCTTGGCCTTC |

|        |                                                                                                                                                                                           |            |                                               |                                       |
|--------|-------------------------------------------------------------------------------------------------------------------------------------------------------------------------------------------|------------|-----------------------------------------------|---------------------------------------|
| EELE39 | <i>Enterococcus italicus</i> DSM 15952                                                                                                                                                    | DSMZ-15952 | AAAGAAGGAGATAGGATCATGAAAATGGAATTAATCGAATGATCG | GTGTAATGGATAGTATCTTAATAGCCGTCGCCGTTTG |
| EU4C4  | <i>Ethanoligenens harbinensis</i> (strain DSM 18485 / JCM 12961 / CGMCC 1.5033 / YUAN-3)                                                                                                  | DSMZ-18485 | AAAGAAGGAGATAGGATCATGGATGGTGTGACGCGA          | GTGTAATGGATAGTATCTTAATAGCCGTCGCCGTTTG |
| EU6W2  | <i>Ethanoligenens harbinensis</i> (strain DSM 18485 / JCM 12961 / CGMCC 1.5033 / YUAN-3)                                                                                                  | DSMZ-18485 | AAAGAAGGAGATAGGATCATGAAAACGGACAGATTTTC        | GTGTAATGGATAGTATCTTAATAGCCGTCGCCGTTTG |
| F05VD2 | <i>Syntrophobolus glycolicus</i> (strain DSM 8271 / FGLyR)                                                                                                                                | DSMZ-8271  | AAAGAAGGAGATAGGATCATGAACTGGCGGAAAAATAG        | GTGTAATGGATAGTATCTTAATGGTCAACGGTGAC   |
| F07ZU0 | <i>Syntrophobolus glycolicus</i> (strain DSM 8271 / FGLyR)                                                                                                                                | DSMZ-8271  | AAAGAAGGAGATAGGATCATGAAAATTTATCTGTATCTGATCTTC | GTGTAATGGATAGTATCTTAATGGTCAACGGTGAC   |
| F1TFH1 | <i>Ruminiclostridium papayrosolvens</i> DSM 2782                                                                                                                                          | DSMZ-2782  | AAAGAAGGAGATAGGATCATGAACTAAGTGGCTGGCTAATTTG   | GTGTAATGGATAGTATCTTAATGGTCAACGGTGAC   |
| F4A0U0 | <i>Mahella australiensis</i> (strain DSM 15567 / CIP 107919 / 50-1 BON)                                                                                                                   | DSMZ-15567 | AAAGAAGGAGATAGGATCATGCTTACTGTTAAGGATAG        | GTGTAATGGATAGTATCTTAATGGTCAACGGTGAC   |
| F5RMP2 | <i>Centipeda periodontii</i> DSM 2778                                                                                                                                                     | DSMZ-2778  | AAAGAAGGAGATAGGATCATGAAAGGAGCTCATGAACTCAGC    | GTGTAATGGATAGTATCTTAATGGTCAACGGTGAC   |
| F6B909 | <i>Desulfotomaculum nigrificans</i> (strain DSM 14880 / VKM B-2319 / CO-1-SRB) (Desulfotomaculum carboxydvorans)                                                                          | DSMZ-14880 | AAAGAAGGAGATAGGATCATGAACTAATCTGGCACC          | GTGTAATGGATAGTATCTTAATGGTCAACGGTGAC   |
| F6DR13 | <i>Desulfotomaculum ruminis</i> (strain ATCC 23193 / DSM 2154 / NCIB 8452 / DL)                                                                                                           | DSMZ-2154  | AAAGAAGGAGATAGGATCATGCTTCATCTGCTCATGATTTG     | GTGTAATGGATAGTATCTTAATGGTCAACGGTGAC   |
| F7NJW4 | <i>Acetonaema longum</i> DSM 6540                                                                                                                                                         | DSMZ-6540  | AAAGAAGGAGATAGGATCATGAACTGATCGCAAAAAC         | GTGTAATGGATAGTATCTTAATGGTCAACGGTGAC   |
| F8LQC6 | <i>Streptococcus salivarius</i> (strain JIM8777)                                                                                                                                          | INTERNE    | AAAGAAGGAGATAGGATCATGCTGTTAATAGCTATAT         | GTGTAATGGATAGTATCTTAATGGTCAACGGTGAC   |
| G4KWG9 | <i>Oscillibacter valericigenes</i> (strain DSM 18026 / NBRC 101213 / Sjim18-20)                                                                                                           | DSMZ-18026 | AAAGAAGGAGATAGGATCATGAACTGAAAGACATTTTATCC     | GTGTAATGGATAGTATCTTAATGGTCAACGGTGAC   |
| G5IH61 | <i>Hungateella hathewayi</i> WAL-18680                                                                                                                                                    | DSMZ-13479 | AAAGAAGGAGATAGGATCATGGACAGACAGAAATTCGAAAC     | GTGTAATGGATAGTATCTTAATGGTCAACGGTGAC   |
| H6LE04 | <i>Acetobacterium woodii</i> (strain ATCC 29683 / DSM 1030 / JCM 2381 / KCTC 1655 / WB1)                                                                                                  | DSMZ-1030  | AAAGAAGGAGATAGGATCATGTTGATTTTAAAAAATGAC       | GTGTAATGGATAGTATCTTAATGGTCAACGGTGAC   |
| H6LE05 | <i>Acetobacterium woodii</i> (strain ATCC 29683 / DSM 1030 / JCM 2381 / KCTC 1655 / WB1)                                                                                                  | DSMZ-1030  | AAAGAAGGAGATAGGATCATGTTGATTTTAAAAAATGAC       | GTGTAATGGATAGTATCTTAATGGTCAACGGTGAC   |
| Q3A247 | <i>Pelobacter carbinolicus</i> (strain DSM 2380 / NBRC 103641 / GraBd1)                                                                                                                   | DSMZ-2380  | AAAGAAGGAGATAGGATCATGAACTCTCCGCCCA            | GTGTAATGGATAGTATCTTAATGGTCAACGGTGAC   |
| Q3ILQ8 | <i>Pseudalteromonas haloplanktis</i> (strain TAC 125)                                                                                                                                     | INTERNE    | AAAGAAGGAGATAGGATCATGTTAAACCAACAAAAGAGGC      | GTGTAATGGATAGTATCTTAATGGTCAACGGTGAC   |
| Q5WHF4 | <i>Bacillus clausii</i> (strain KSM-K16)                                                                                                                                                  | DSMZ-8716  | AAAGAAGGAGATAGGATCATGGCAACCGGATCGCAA          | GTGTAATGGATAGTATCTTAATGGTCAACGGTGAC   |
| Q65H59 | <i>Bacillus licheniformis</i> (strain ATCC 14580 / DSM 13 / JCM 2505 / NBRC 12200 / NCIMB 9375 / NRRL NRS-1264 / Gibson 46)                                                               | DSMZ-13    | AAAGAAGGAGATAGGATCATGAACTGCAAAAATTGCG         | GTGTAATGGATAGTATCTTAATGGTCAACGGTGAC   |
| Q6ALS3 | <i>Desulfotalea psychrophila</i> (strain LVS4 / DSM 12343)                                                                                                                                | DSMZ-12343 | AAAGAAGGAGATAGGATCATGAATCAATCATTAGCCCG        | GTGTAATGGATAGTATCTTAATGGTCAACGGTGAC   |
| Q7UP17 | <i>Rhodopirellula baltica</i> (strain DSM 10527 / NCIMB 13988 / SH1)                                                                                                                      | DSMZ-10527 | AAAGAAGGAGATAGGATCATGGCCGACCCAGCCT            | GTGTAATGGATAGTATCTTAATGGTCAACGGTGAC   |
| Q892F2 | <i>Bacteroides thetaiotaomicron</i> (strain ATCC 29148 / DSM 2079 / NCTC 10582 / E50 / VPI-5482)                                                                                          | DSMZ-2079  | AAAGAAGGAGATAGGATCATGAAAGAAAATAAAGCAAG        | GTGTAATGGATAGTATCTTAATGGTCAACGGTGAC   |
| Q8NTC4 | <i>Corynebacterium glutamicum</i> (strain ATCC 13032 / DSM 20300 / JCM 1318 / LMG 3730 / NCIMB 10025)                                                                                     | DSMZ-20300 | AAAGAAGGAGATAGGATCATGACGATTTCCGCCCTC          | GTGTAATGGATAGTATCTTAATGGTCAACGGTGAC   |
| Q8RB49 | <i>Caldaneroobacter subterraneus</i> subsp. <i>tengcongensis</i> (strain DSM 15242 / JCM 11007 / NBRC 100824 / MB4) (Thermoanaerobacter tengcongensis)                                    | DSMZ-15242 | AAAGAAGGAGATAGGATCATGTTGAAAAGAGGAAATC         | GTGTAATGGATAGTATCTTAATGGTCAACGGTGAC   |
| Q9Y948 | <i>Aeropyrum pernix</i> (strain ATCC 700893 / DSM 11879 / JCM 9820 / NBRC 100138 / K1)                                                                                                    | DSMZ-11879 | AAAGAAGGAGATAGGATCATGCCGTCGCCAGGGAT           | GTGTAATGGATAGTATCTTAATGGTCAACGGTGAC   |
| A4ABW3 | <i>Congregibacter litoralis</i> K71                                                                                                                                                       | DSMZ-17192 | AAAGAAGGAGATAGGATCATGAATGCTACGCAACGC          | GTGTAATGGATAGTATCTTAATGGTCAACGGTGAC   |
| A7NMT7 | <i>Roseiflexus castenholzii</i> (strain DSM 13941 / HLO8)                                                                                                                                 | DSMZ-13941 | AAAGAAGGAGATAGGATCATGCTCGACATCTCGCTC          | GTGTAATGGATAGTATCTTAATGGTCAACGGTGAC   |
| BOFAF2 | <i>Helioibacterium modesticalium</i> (strain ATCC 51547 / ce1)                                                                                                                            | ATCC-51547 | AAAGAAGGAGATAGGATCATGATGCGTGAAGCTTCC          | GTGTAATGGATAGTATCTTAATGGTCAACGGTGAC   |
| B8HFF3 | <i>Pseudorhizobium chlorophenolicus</i> (strain ATCC 700700 / DSM 12829 / CIP 107037 / JCM 12360 / KCTC 9906 / NCIMB 13794 / A6) (Arthrobacter chlorophenolicus)                          | DSMZ-12829 | AAAGAAGGAGATAGGATCATGACCAACGAAGCACC           | GTGTAATGGATAGTATCTTAATGGTCAACGGTGAC   |
| COCB27 | <i>[Clostridium] asparagiforme</i> DSM 15981                                                                                                                                              | DSMZ-15981 | AAAGAAGGAGATAGGATCATGGGATTAACAATGAAAA         | GTGTAATGGATAGTATCTTAATGGTCAACGGTGAC   |
| COCD42 | <i>[Clostridium] asparagiforme</i> DSM 15981                                                                                                                                              | DSMZ-15981 | AAAGAAGGAGATAGGATCATGGGAGAAATGAGATACAG        | GTGTAATGGATAGTATCTTAATGGTCAACGGTGAC   |
| C4FBU4 | <i>Collinsella intestinalis</i> DSM 13280                                                                                                                                                 | DSMZ-13280 | AAAGAAGGAGATAGGATCATGAAAGGAAACCACTGTC         | GTGTAATGGATAGTATCTTAATGGTCAACGGTGAC   |
| C7LX90 | <i>Desulfomicrobium baculatum</i> (strain DSM 4028 / VKM B-1378) (Desulfovibrio baculatus)                                                                                                | DSMZ-4028  | AAAGAAGGAGATAGGATCATGAGGATATTTGGATAGTACGAC    | GTGTAATGGATAGTATCTTAATGGTCAACGGTGAC   |
| C8WY41 | <i>Alicyclobacillus acidocaldarius</i> subsp. <i>acidocaldarius</i> (strain ATCC 27009 / DSM 446 / JCM 5260 / NBRC 15652 / NCIMB 11725 / NRRL B-14509 / 104-1A) (Bacillus acidocaldarius) | DSMZ-446   | AAAGAAGGAGATAGGATCATGGCGTGAGCGGGCA            | GTGTAATGGATAGTATCTTAATGGTCAACGGTGAC   |
| C9KLB4 | <i>Mitsuokella multicauda</i> DSM 20544                                                                                                                                                   | DSMZ-20544 | AAAGAAGGAGATAGGATCATGAAAGCAGCAGAGATCC         | GTGTAATGGATAGTATCTTAATGGTCAACGGTGAC   |
| D0LX28 | <i>Gordonia bronchialis</i> (strain ATCC 25592 / DSM 43247 / JCM 3198 / NCTC 10667) (Rhodococcus bronchialis)                                                                             | DSMZ-43247 | AAAGAAGGAGATAGGATCATGACCAACCCGACCTG           | GTGTAATGGATAGTATCTTAATGGTCAACGGTGAC   |
| D0MHJ1 | <i>Rhodothermus marinus</i> (strain ATCC 43812 / DSM 4252 / R-10) (Rhodothermus abamensis)                                                                                                | DSMZ-4252  | AAAGAAGGAGATAGGATCATGACGCCCAAGAACTC           | GTGTAATGGATAGTATCTTAATGGTCAACGGTGAC   |
| D1B7V1 | <i>Thermanaerobium acidaminovorans</i> (strain ATCC 49978 / DSM 6589 / Su883) (Selenomonas acidaminovorans)                                                                               | DSMZ-6589  | AAAGAAGGAGATAGGATCATGATCGCAGGAGGCTG           | GTGTAATGGATAGTATCTTAATGGTCAACGGTGAC   |
| D1P71  | <i>Subdoligranulum variabile</i> DSM 15176                                                                                                                                                | DSMZ-15176 | AAAGAAGGAGATAGGATCATGAAATCAACCAAGAAATATGCTG   | GTGTAATGGATAGTATCTTAATGGTCAACGGTGAC   |
| D1Z332 | <i>Methanocella paludicola</i> (strain DSM 17711 / JCM 13418 / NBRC 101707 / SANAE)                                                                                                       | DSMZ-17711 | AAAGAAGGAGATAGGATCATGGACCCCGGAGTTT            | GTGTAATGGATAGTATCTTAATGGTCAACGGTGAC   |
| D7BB17 | <i>Methanothermobacter silvanus</i> (strain ATCC 700542 / DSM 9946 / VI-R2) (Thermus silvanus)                                                                                            | DSMZ-9946  | AAAGAAGGAGATAGGATCATGAAATAGCCGATTCATCGAC      | GTGTAATGGATAGTATCTTAATGGTCAACGGTGAC   |
| D7BD10 | <i>Methanothermobacter silvanus</i> (strain ATCC 700542 / DSM 9946 / VI-R2) (Thermus silvanus)                                                                                            | DSMZ-9946  | AAAGAAGGAGATAGGATCATGCCAGTGAATTCGCATA         | GTGTAATGGATAGTATCTTAATGGTCAACGGTGAC   |
| D9Q354 | <i>Acidilobus saccharovorans</i> (strain DSM 16705 / JCM 18335 / VKM B-2471 / 345-15)                                                                                                     | DSMZ-16705 | AAAGAAGGAGATAGGATCATGGGCTCCAGGAGCT            | GTGTAATGGATAGTATCTTAATGGTCAACGGTGAC   |
| E0RP49 | <i>Spirochaeta thermophila</i> (strain ATCC 49972 / DSM 6192 / RI 19 B1)                                                                                                                  | DSMZ-6192  | AAAGAAGGAGATAGGATCATGGCGGAAACAAATGAGC         | GTGTAATGGATAGTATCTTAATGGTCAACGGTGAC   |
| E1QX59 | <i>Olsonella uli</i> (strain ATCC 49627 / DSM 7084 / CIP 109912 / JCM 12494 / NCIMB 702895 / VPI D76D-27C) (Lactobacillus uli)                                                            | DSMZ-7084  | AAAGAAGGAGATAGGATCATGAGGCTCAACCAAGTACA        | GTGTAATGGATAGTATCTTAATGGTCAACGGTGAC   |
| E1QY1  | <i>Olsonella uli</i> (strain ATCC 49627 / DSM 7084 / CIP 109912 / JCM 12494 / NCIMB 702895 / VPI D76D-27C) (Lactobacillus uli)                                                            | DSMZ-7084  | AAAGAAGGAGATAGGATCATGGCCAGTTACACGATC          | GTGTAATGGATAGTATCTTAATGGTCAACGGTGAC   |
| E1V588 | <i>Halomonas elongata</i> (strain ATCC 33173 / DSM 2581 / NBRC 15536 / NCIMB 2198 / 1H9)                                                                                                  | DSMZ-2581  | AAAGAAGGAGATAGGATCATGAAAGCACTCACCCGGAC        | GTGTAATGGATAGTATCTTAATGGTCAACGGTGAC   |
| E3D079 | <i>Aminomonas paucivorans</i> DSM 12260                                                                                                                                                   | DSMZ-12260 | AAAGAAGGAGATAGGATCATGAAAGGAGCAGGTTCCG         | GTGTAATGGATAGTATCTTAATGGTCAACGGTGAC   |
| E4NPT1 | <i>Halogeometricum borinquense</i> (strain ATCC 700274 / DSM 11551 / JCM 10706 / PR3)                                                                                                     | DSMZ-11551 | AAAGAAGGAGATAGGATCATGGACCCGACCGAGTTC          | GTGTAATGGATAGTATCTTAATGGTCAACGGTGAC   |
| F7X6C2 | <i>Sinarhizobium mellii</i> (strain SM11)                                                                                                                                                 | DSMZ-30135 | AAAGAAGGAGATAGGATCATGAAACAAATAGCAACC          | GTGTAATGGATAGTATCTTAATGGTCAACGGTGAC   |
| H1N0L9 | <i>Singulisphaera acidiphila</i> DSM 18658                                                                                                                                                | DSMZ-18658 | AAAGAAGGAGATAGGATCATGAAATTCACCTACGAA          | GTGTAATGGATAGTATCTTAATGGTCAACGGTGAC   |
| H1P040 | <i>Holophaga foetida</i> DSM 6591                                                                                                                                                         | DSMZ-6591  | AAAGAAGGAGATAGGATCATGCTCTCAACTGTGCAACC        | GTGTAATGGATAGTATCTTAATGGTCAACGGTGAC   |
| I017R3 | <i>Calidinea aerophila</i> (strain DSM 14535 / JCM 11387 / NBRC 104270 / STL-6-03)                                                                                                        | DSMZ-14535 | AAAGAAGGAGATAGGATCATGAACTGAAAGAGCGCATCC       | GTGTAATGGATAGTATCTTAATGGTCAACGGTGAC   |
| Q2KDR9 | <i>Rhizobium etli</i> (strain CFN 42 / ATCC 51251)                                                                                                                                        | DSMZ-11541 | AAAGAAGGAGATAGGATCATGAATGCCATTCATCCG          | GTGTAATGGATAGTATCTTAATGGTCAACGGTGAC   |
| Q2NW06 | <i>Sodalis glossinidius</i> (strain marisants)                                                                                                                                            | DSMZ-16929 | AAAGAAGGAGATAGGATCATGAATCAATTAACCTTGGC        | GTGTAATGGATAGTATCTTAATGGTCAACGGTGAC   |
| Q2RR22 | <i>Rhodospirillum rubrum</i> (strain ATCC 11170 / ATH 1.1.1 / DSM 467 / LMG 4362 / NCIB 8255 / S1)                                                                                        | DSMZ-467   | AAAGAAGGAGATAGGATCATGACGAAACCCGACCAAC         | GTGTAATGGATAGTATCTTAATGGTCAACGGTGAC   |
| Q6A655 | <i>Cutibacterium acnes</i> (strain DSM 16379 / KPA171202) (Propionibacterium acnes)                                                                                                       | DSMZ-16379 | AAAGAAGGAGATAGGATCATGCTCTGCCCACTG             | GTGTAATGGATAGTATCTTAATGGTCAACGGTGAC   |
| Q7NRS9 | <i>Chromobacterium violaceum</i> (strain ATCC 12472 / DSM 30191 / JCM 1249 / NBRC 12614 / NCIMB 9131 / NCTC 9757)                                                                         | DSMZ-30191 | AAAGAAGGAGATAGGATCATGCTGCACTGATTGAAGC         | GTGTAATGGATAGTATCTTAATGGTCAACGGTGAC   |
| Q8FS10 | <i>Corynebacterium efficiens</i> (strain DSM 44549 / YS-314 / AJ 12310 / JCM 11189 / NBRC 100395)                                                                                         | DSMZ-44549 | AAAGAAGGAGATAGGATCATGCAAGGATTCACGTA           | GTGTAATGGATAGTATCTTAATGGTCAACGGTGAC   |
| Q8UJ09 | <i>Agrobacterium fabrum</i> (strain C58 / ATCC 33970) (Agrobacterium tumefaciens (strain C58))                                                                                            | DSMZ-5172  | AAAGAAGGAGATAGGATCATGGAATCCACGCTCCG           | GTGTAATGGATAGTATCTTAATGGTCAACGGTGAC   |
| A1T399 | <i>Mycobacterium vanbaalenii</i> (strain DSM 7251 / PYR-1)                                                                                                                                | DSMZ-7251  | AAAGAAGGAGATAGGATCATGGTCTCTACCTCCG            | GTGTAATGGATAGTATCTTAATGGTCAACGGTGAC   |
| B0RD13 | <i>Clavibacter michiganensis</i> subsp. <i>sepedonicus</i> (strain ATCC 33113 / DSM 20744 / JCM 9667 / LMG 2889 / C-1) (Corynebacterium sepedonicum)                                      | DSMZ-46364 | AAAGAAGGAGATAGGATCATGACCAACCCGCTGCC           | GTGTAATGGATAGTATCTTAATGGTCAACGGTGAC   |
| B2GG36 | <i>Kocuria rhizophila</i> (strain ATCC 9341 / DSM 348 / NBRC 103217 / DC2201)                                                                                                             | DSMZ-348   | AAAGAAGGAGATAGGATCATGATCCCGCGCAGAG            | GTGTAATGGATAGTATCTTAATGGTCAACGGTGAC   |



Table S4. DERAs from the collection with significant activity for at least one reaction. The number represents the ratio [(product measured in presence of recombinant DERA)/(product measured in E. coli cell free extract with an empty vector of over-expression)]. We chose a five-fold magnitude over the blank control to be significant. Significant values are shown in green in the following table. Values under a 5 fold magnitude are shown in grey. The selected enzymes for further experiments are shown in yellow.

|    | Uniprot ID | Genome                                                                                                  | Ratio (DERA reaction/cell free extract) |                    |         |
|----|------------|---------------------------------------------------------------------------------------------------------|-----------------------------------------|--------------------|---------|
|    |            |                                                                                                         | G3P + acetone                           | G3P/cyclopentanone | G3P+DHA |
| 1  | A3DL3      | <i>Staphylothermus marinus</i> (strain ATCC 43588 / DSM 3639 / F1)                                      | 2                                       | 21                 | 1       |
| 2  | A5FJ8      | <i>Flavobacterium johnsoniae</i> (strain ATCC 17061 / DSM 2064 / UW101)                                 | 4                                       | 333                | 1       |
| 3  | A5VHQ9     | <i>Lactobacillus reuteri</i> (strain DSM 20016)                                                         | 7                                       | 399                | 1       |
| 4  | A6H1F6     | <i>Flavobacterium psychrophilum</i> (strain JIP02/86 / ATCC 49511)                                      | 5                                       | 409                | 1       |
| 5  | A7HN67     | <i>Fervidobacterium nodosum</i> (strain ATCC 35602 / DSM 5306 / Rt17-B1)                                | 1                                       | 16                 | 1       |
| 6  | A8F3L9     | <i>Thermotoga lettingae</i> (strain ATCC BAA-301 / DSM 14385 / TMO)                                     | 2                                       | 347                | 1       |
| 7  | A8MH18     | <i>Alkaliphilus oremlandii</i> (strain OhILAs)                                                          | 6                                       | 23                 | 1       |
| 8  | A9BEN0     | <i>Petrotoga mobilis</i> (strain DSM 10674 / SJ95)                                                      | 2                                       | 11                 | 1       |
| 9  | A9KKG9     | <i>Clostridium phytofermentans</i> (strain ATCC 700394 / DSM 18823 / ISDg)                              | 7                                       | 134                | 3       |
| 10 | B050N1     | <i>Fingoldia magna</i> (strain ATCC 29328)                                                              | 7                                       | 134                | 2       |
| 11 | B1C5N8     | <i>Anaerofustis stercorihominis</i> DSM 17244                                                           | 6                                       | 29                 | 2       |
| 12 | B1C7X1     | <i>Anaerofustis stercorihominis</i> DSM 17244                                                           | 8                                       | 1436               | 1       |
| 13 | B1C9V1     | <i>Anaerofustis stercorihominis</i> DSM 17244                                                           | 6                                       | 2                  | 1       |
| 14 | B5YES7     | <i>Dictyoglomus thermophilum</i> (strain ATCC 35947 / DSM 3960 / H-6-12)                                | 2                                       | 14                 | 1       |
| 15 | B6FZF5     | <i>Clostridium hiranonis</i> DSM 13275                                                                  | 3                                       | 328                | 2       |
| 16 | B6WB70     | <i>Anaerococcus hydrogenalis</i> DSM 7454                                                               | 5                                       | 19                 | 1       |
| 17 | B7CBX4     | <i>Eubacterium bifforme</i> DSM 3989                                                                    | 6                                       | 44                 | 1       |
| 18 | B7CCR8     | <i>Eubacterium bifforme</i> DSM 3989                                                                    | 7                                       | 4941               | 13      |
| 19 | B8I9D0     | <i>Clostridium cellulolyticum</i> (strain ATCC 35319 / DSM 5812 / JCM 6584 / H10)                       | 8                                       | 164                | 1       |
| 20 | B9MKK9     | <i>Anaerocellum thermophilum</i> (strain DSM 6725 / Z-1320)                                             | 3                                       | 84                 | 1       |
| 21 | C0EYB5     | <i>Eubacterium hallii</i> DSM 3353                                                                      | 3                                       | 68                 | 1       |
| 22 | C0QSF7     | <i>Persephonella marina</i> (strain DSM 14350 / EX-H1)                                                  | 2                                       | 23                 | 1       |
| 23 | C1DW64     | <i>Sulfurihydrogenibium azorense</i> (strain Az-Fu1 / DSM 15241 / OCM 825)                              | 2                                       | 129                | 1       |
| 24 | C6A3K7     | <i>Thermococcus sibiricus</i> (strain MM 739 / DSM 12597)                                               | 3                                       | 7                  | 1       |
| 25 | C7N8Y8     | <i>Leptotrichia buccalis</i> (strain ATCC 14201 / DSM 1135 / JCM 12969 / NCTC 10249)                    | 8                                       | 129                | 2       |
| 26 | C7RF30     | <i>Anaerococcus prevotii</i> (strain ATCC 9321 / DSM 20548 / JCM 6508 / PC1)                            | 5                                       | 63                 | 1       |
| 27 | D1BL34     | <i>Veillonella parvula</i> (strain ATCC 10790 / DSM 2008 / JCM 12972 / Te3)                             | 9                                       | 740                | 1       |
| 28 | D3DY5      | <i>Methanobrevibacter ruminantium</i> (strain ATCC 35063 / DSM 1093 / JCM 13430 / M1)                   | 9                                       | 864                | 1       |
| 29 | D3PD71     | <i>Deferribacter desulfuricans</i> (strain DSM 14783 / JCM 11476 / NBRC 101012 / SSM1)                  | 1                                       | 16                 | 1       |
| 30 | D5DGD3     | <i>Bacillus megaterium</i> (strain DSM 319)                                                             | 8                                       | 103                | 1       |
| 31 | D5U8N7     | <i>Brachyspira murdochii</i> (strain ATCC 51284 / DSM 12563 / 56-150)                                   | 7                                       | 63                 | 1       |
| 32 | D8GI14     | <i>Clostridium ljungdahlii</i> (strain ATCC 55383 / DSM 13528 / PETC)                                   | 5                                       | 76                 | 1       |
| 33 | A0A166TB09 | <i>Lactococcus lactis</i> subsp. <i>cremoris</i> (strain NZ9000)                                        | 7                                       | 65                 | 3       |
| 34 | D9SKJ3     | <i>Clostridium cellulovorans</i> (strain ATCC 35296 / DSM 3052 / OCM 3 / 743B)                          | 7                                       | 49                 | 1       |
| 35 | D9TPN8     | <i>Thermoanaerobacterium thermosaccharolyticum</i> (strain ATCC 7956 / DSM 571 / NCIB 9385 / NCA 3814)  | 1                                       | 5                  | 1       |
| 36 | E0SNU4     | <i>Ignisphaera aggregans</i> (strain DSM 17230 / JCM 13409 / AQ1,S1)                                    | 4                                       | 302                | 1       |
| 37 | E2NRK0     | <i>Catenibacterium mitsuokai</i> DSM 15897                                                              | 8                                       | 4791               | 9       |
| 38 | E3DLZ8     | <i>Halanaerobium praevalens</i> (strain ATCC 33744 / DSM 2228 / GSL)                                    | 7                                       | 68                 | 2       |
| 39 | E3DQ67     | <i>Halanaerobium praevalens</i> (strain ATCC 33744 / DSM 2228 / GSL)                                    | 11                                      | 127                | 1       |
| 40 | E3H811     | <i>Ilyobacter polytropus</i> (strain DSM 2926 / CuHBu1)                                                 | 3                                       | 13                 | 1       |
| 41 | E3PT30     | <i>Clostridium sticklandii</i> (strain ATCC 12662 / DSM 519 / JCM 1433 / NCIB 10654)                    | 9                                       | 38                 | 1       |
| 42 | E4TDN5     | <i>Riemerella anatipestifer</i> (strain ATCC 11845 / DSM 15868 / JCM 9532 / NCTC 11014)                 | 7                                       | 352                | 2       |
| 43 | E4TMX4     | <i>Marivirga tractuosa</i> (strain ATCC 23168 / DSM 4126 / NBRC 15989 / NCIMB 1408 / VKM B-1430 / H-43) | 6                                       | 13                 | 1       |
| 44 | E6TW33     | <i>Bacillus cellulosityticus</i> (strain ATCC 21833 / DSM 2522 / FERM P-1141 / JCM 9156 / N-4)          | 9                                       | 235                | 2       |
| 45 | F2JSP1     | <i>Cellulosilyticum lentocellum</i> (strain ATCC 49066 / DSM 5427 / NCIMB 11756 / RHM5)                 | 7                                       | 135                | 2       |
| 46 | G2PMV9     | <i>Muricauda ruestringensis</i> (strain DSM 13258 / LMG 19739 / B1)                                     | 2                                       | 9                  | 1       |
| 47 | G4L3F2     | <i>Tetragenococcus halophilus</i> (strain DSM 20338 / JCM 20259 / NCIMB 9735 / NBRC 12172)              | 1                                       | 22                 | 1       |
| 48 | G4L5P7     | <i>Tetragenococcus halophilus</i> (strain DSM 20338 / JCM 20259 / NCIMB 9735 / NBRC 12172)              | 5                                       | 8                  | 1       |
| 49 | G4L7G6     | <i>Tetragenococcus halophilus</i> (strain DSM 20338 / JCM 20259 / NCIMB 9735 / NBRC 12172)              | 6                                       | 1511               | 5       |
| 50 | H2J323     | <i>Marinitoga piezophila</i> (strain DSM 14283 / JCM 11233 / KA3)                                       | 5                                       | 36                 | 1       |

|     |            |                                                                                    |    |      |    |
|-----|------------|------------------------------------------------------------------------------------|----|------|----|
| 51  | H6LFY1     | <i>Acetobacterium woodii</i> (strain ATCC 29683 / DSM 1030 / JCM 2381 / KCTC 1655) | 3  | 5    | 1  |
| 52  | P44430     | <i>Haemophilus influenzae</i> (strain ATCC 51907 / DSM 11121 / KW20 / Rd)          | 20 | 479  | 8  |
| 53  | Q483R4     | <i>Collwellia psychreerythraea</i> (strain 34H / ATCC BAA-681)                     | 3  | 78   | 2  |
| 54  | A0A150VED5 | <i>Legionella pneumophila</i> (strain Paris)                                       | 6  | 204  | 1  |
| 55  | Q73QJ5     | <i>Treponema denticola</i> (strain ATCC 35405 / CIP 103919 / DSM 14222)            | 6  | 174  | 1  |
| 56  | Q8E2U1     | <i>Streptococcus agalactiae</i> serotype III (strain NEM316)                       | 8  | 526  | 4  |
| 57  | Q9AIP7     | <i>Streptococcus mutans</i>                                                        | 6  | 40   | 1  |
| 58  | A1HNM9     | <i>Thermosinus carboxydovorans</i> Nor1                                            | 5  | 224  | 1  |
| 59  | A1RU26     | <i>Pyrobaculum islandicum</i> (strain DSM 4184 / JCM 9189)                         | 3  | 12   | 1  |
| 60  | A2BLE9     | <i>Hyperthermus butylicus</i> (strain DSM 5456 / JCM 9403)                         | 1  | 17   | 1  |
| 61  | A3DFT0     | <i>Clostridium thermocellum</i> (strain ATCC 27405 / DSM 1237)                     | 10 | 355  | 2  |
| 62  | A3DGT2     | <i>Clostridium thermocellum</i> (strain ATCC 27405 / DSM 1237)                     | 6  | 469  | 1  |
| 63  | A3QGT3     | <i>Shewanella loihica</i> (strain ATCC BAA-1088 / PV-4)                            | 9  | 1353 | 2  |
| 64  | A4A0J5     | <i>Blastopirellula marina</i> DSM 3645                                             | 8  | 586  | 1  |
| 65  | A4A0J5     | <i>Blastopirellula marina</i> DSM 3645                                             | 8  | 554  | 1  |
| 66  | A5EY74     | <i>Dichelobacter nodosus</i> (strain VCS1703A)                                     | 7  | 202  | 1  |
| 67  | A6LG64     | <i>Parabacteroides distasonis</i> (strain ATCC 8503 / DSM 20701 / NCTC 11152)      | 3  | 8    | 1  |
| 68  | A7NMK6     | <i>Roseiflexus castenholzii</i> (strain DSM 13941 / HLO8)                          | 3  | 5    | 1  |
| 69  | A7VSD0     | <i>Clostridium leptum</i> DSM 753                                                  | 8  | 26   | 1  |
| 70  | A7VWB3     | <i>Clostridium leptum</i> DSM 753                                                  | 8  | 412  | 16 |
| 71  | A8RFU5     | <i>Eubacterium dolichum</i> DSM 3991                                               | 7  | 48   | 1  |
| 72  | A8RNT5     | <i>Clostridium bolteae</i> ATCC BAA-613                                            | 5  | 1    | 1  |
| 73  | A8RSU8     | <i>Clostridium bolteae</i> ATCC BAA-613                                            | 7  | 6    | 1  |
| 74  | A8S319     | <i>Clostridium bolteae</i> ATCC BAA-613                                            | 7  | 6    | 1  |
| 75  | B0MAA8     | <i>Anaerostipes caccae</i> DSM 14662                                               | 8  | 2    | 1  |
| 76  | B0MAE3     | <i>Anaerostipes caccae</i> DSM 14662                                               | 5  | 244  | 11 |
| 77  | B0MET2     | <i>Anaerostipes caccae</i> DSM 14662                                               | 7  | 4    | 1  |
| 78  | B0MY8      | <i>Alistipes putredinis</i> DSM 17216                                              | 8  | 60   | 1  |
| 79  | B0NSF0     | <i>Bacteroides stercoris</i> ATCC 43183                                            | 8  | 114  | 1  |
| 80  | B0P6M5     | <i>Anaerotruncus colihominis</i> DSM 17241                                         | 8  | 11   | 1  |
| 81  | B0PHA1     | <i>Anaerotruncus colihominis</i> DSM 17241                                         | 8  | 5    | 1  |
| 82  | B1HTK8     | <i>Lysinibacillus sphaericus</i> (strain C3-41)                                    | 6  | 5    | 2  |
| 83  | B1YKT7     | <i>Exiguobacterium sibiricum</i> (strain DSM 17290 / JCM 13490 / 255-15)           | 6  | 9    | 2  |
| 84  | B3QZ00     | <i>Chloroherpeton thalassium</i> (strain ATCC 35110 / GB-78)                       | 5  | 5    | 1  |
| 85  | B5CU41     | <i>Bacteroides plebeius</i> DSM 17135                                              | 6  | 58   | 1  |
| 86  | B7B6E0     | <i>Parabacteroides johnsonii</i> DSM 18315                                         | 8  | 139  | 1  |
| 87  | B7GMN1     | <i>Anoxybacillus flavithermus</i> (strain DSM 21510 / WK1)                         | 7  | 15   | 2  |
| 88  | B8CXI0     | <i>Halothermothrix orenii</i> (strain H 168 / OCM 544 / DSM 9562)                  | 6  | 30   | 2  |
| 89  | B8FUK9     | <i>Desulfotobacterium hafniense</i> (strain DCB-2 / DSM 10664)                     | 7  | 8    | 1  |
| 90  | B9Y9Z6     | <i>Holdemania filiformis</i> DSM 12042                                             | 5  | 151  | 4  |
| 91  | B9YB21     | <i>Holdemania filiformis</i> DSM 12042                                             | 8  | 22   | 4  |
| 92  | C0C305     | <i>Clostridium hylemonae</i> DSM 15053                                             | 8  | 18   | 1  |
| 93  | C0C3B7     | <i>Clostridium hylemonae</i> DSM 15053                                             | 5  | 5    | 1  |
| 94  | C0CND6     | <i>Blautia hydrogenotrophica</i> DSM 10507                                         | 6  | 15   | 1  |
| 95  | C0CZD0     | <i>Clostridium asparagiforme</i> DSM 15981                                         | 8  | 5    | 1  |
| 96  | C0D9N4     | <i>Clostridium asparagiforme</i> DSM 15981                                         | 4  | 92   | 2  |
| 97  | C0DA78     | <i>Clostridium asparagiforme</i> DSM 15981                                         | 6  | 5    | 1  |
| 98  | C0W0V9     | <i>Actinomyces coleocanis</i> DSM 15436                                            | 4  | 12   | 1  |
| 99  | C0W106     | <i>Actinomyces coleocanis</i> DSM 15436                                            | 5  | 12   | 1  |
| 100 | C0WZ11     | <i>Lactobacillus fermentum</i> ATCC 14931                                          | 3  | 5    | 1  |



|     |            |                                                                                                     |   |     |    |
|-----|------------|-----------------------------------------------------------------------------------------------------|---|-----|----|
| 101 | C0X8W3     | <i>Enterococcus faecalis</i> TX0104                                                                 | 5 | 5   | 2  |
| 102 | C3P120     | <i>Corynebacterium aurimucosum</i> (strain ATCC 700975 / DSM 44827 / CN-1)                          | 6 | 4   | 1  |
| 103 | C4LAZ1     | <i>Tolomonas auensis</i> (strain DSM 9187 / TA4)                                                    | 8 | 151 | 2  |
| 104 | C4LX4      | <i>Corynebacterium kroppenstedtii</i> (strain DSM 44385 / CCUG 35717)                               | 6 | 7   | 1  |
| 105 | C6LIB8     | <i>Marvinbryantia formatexigens</i> DSM 14469                                                       | 7 | 35  | 3  |
| 106 | C7PV91     | <i>Chitinophaga pinensis</i> (strain ATCC 43595 / DSM 2588 / NCIB 11800 / UQM 2034)                 | 6 | 5   | 1  |
| 107 | C7R2C3     | <i>Jonesia denitrificans</i> (strain ATCC 14870 / DSM 20603 / CIP 55134)                            | 5 | 17  | 2  |
| 108 | C7REE6     | <i>Anaerococcus prevotii</i> (strain ATCC 9321 / DSM 20548 / JCM 6508 / PC1)                        | 5 | 1   | 1  |
| 109 | C8W218     | <i>Desulfotomaculum acetoxidans</i> (strain ATCC 49208 / DSM 771 / VKM B-1644)                      | 3 | 34  | 1  |
| 110 | C8W8Y2     | <i>Atopobium parvulum</i> (strain ATCC 33793 / DSM 20469 / JCM 10300 / VPI 0546)                    | 5 | 90  | 1  |
| 111 | C9LPE9     | <i>Dialister invisus</i> DSM 15470                                                                  | 6 | 9   | 1  |
| 112 | D1PG70     | <i>Prevotella copri</i> DSM 18205                                                                   | 6 | 99  | 1  |
| 113 | D2R096     | <i>Pirellula staleyii</i> (strain ATCC 27377 / DSM 6068 / ICPB 4128)                                | 5 | 219 | 12 |
| 114 | D2Z780     | <i>Dethiosulfovibrio peptidovorans</i> DSM 11002                                                    | 3 | 41  | 1  |
| 115 | D3ADZ1     | <i>Clostridium hathewayi</i> DSM 13479                                                              | 4 | 33  | 2  |
| 116 | D3AF28     | <i>Clostridium hathewayi</i> DSM 13479                                                              | 6 | 18  | 1  |
| 117 | D3AHT8     | <i>Clostridium hathewayi</i> DSM 13479                                                              | 4 | 7   | 1  |
| 118 | D3AQA5     | <i>Clostridium hathewayi</i> DSM 13479                                                              | 5 | 3   | 1  |
| 119 | D3AT22     | <i>Clostridium hathewayi</i> DSM 13479                                                              | 6 | 2   | 1  |
| 120 | D3DHG9     | <i>Hydrogenobacter thermophilus</i> (strain DSM 6534 / IAM 12695 / TK-6)                            | 2 | 6   | 1  |
| 121 | D4BZH8     | <i>Providencia rettgeri</i> DSM 1131                                                                | 6 | 3   | 1  |
| 122 | D4E8M0     | <i>Serratia odorifera</i> DSM 4582                                                                  | 5 | 16  | 2  |
| 123 | D4RYH7     | <i>Butyrivibrio crossotus</i> DSM 2876                                                              | 5 | 3   | 1  |
| 124 | D5EHZ9     | <i>Coralliomargarita akajimensis</i> (strain DSM 45221 / IAM 15411 / JCM 23193 / KCTC 12865)        | 4 | 17  | 2  |
| 125 | D6XYX2     | <i>Bacillus selenitireducens</i> (strain ATCC 700615 / DSM 15326 / MLS10)                           | 4 | 24  | 4  |
| 126 | D7BJY9     | <i>Arcanobacterium haemolyticum</i> (strain ATCC 9345 / DSM 20595 / NBRC 15585 / NCTC 8452 / 11018) | 5 | 12  | 1  |
| 127 | D7UWC5     | <i>Listeria grayi</i> DSM 20601                                                                     | 4 | 146 | 8  |
| 128 | D9PX57     | <i>Methanothermobacter marburgensis</i> (strain DSM 2133 / 14651 / NBRC 100331 / OCM 82 / Marburg)  | 1 | 30  | 1  |
| 129 | D9R027     | <i>Clostridium saccharolyticum</i> (strain ATCC 35040 / DSM 2544 / NRCC 2533 / WM1)                 | 3 | 6   | 1  |
| 130 | D9R1L8     | <i>Clostridium saccharolyticum</i> (strain ATCC 35040 / DSM 2544 / NRCC 2533 / WM1)                 | 3 | 30  | 2  |
| 131 | D9RZ35     | <i>Thermosediminibacter oceani</i> (strain ATCC BAA-1034 / DSM 16646 / JW/IW-1228P)                 | 1 | 7   | 1  |
| 132 | E0NU04     | <i>Prevotella marshii</i> DSM 16973                                                                 | 2 | 38  | 1  |
| 133 | A0A380KU85 | <i>Streptococcus mitis</i> NCTC 12261                                                               | 3 | 6   | 4  |
| 134 | E1R2M2     | <i>Spirochaeta smaragdinae</i> (strain DSM 11293 / JCM 15392 / SEBR 4228)                           | 0 | 26  | 1  |
| 135 | E1R7K7     | <i>Spirochaeta smaragdinae</i> (strain DSM 11293 / JCM 15392 / SEBR 4228)                           | 1 | 8   | 1  |
| 136 | E1R9R0     | <i>Spirochaeta smaragdinae</i> (strain DSM 11293 / JCM 15392 / SEBR 4228)                           | 3 | 6   | 1  |
| 137 | E1VTU5     | <i>Arthrobacter arilaitensis</i> (strain DSM 16368 / CIP 108037 / JCM 13566 / Re117)                | 3 | 12  | 3  |
| 138 | E1X340     | <i>Bacteriovorax marinus</i> (strain ATCC BAA-682 / DSM 15412 / S.J)                                | 3 | 12  | 2  |
| 139 | E4HP27     | <i>Propionibacterium acnes</i> HL044PA1                                                             | 0 | 10  | 1  |
| 140 | E4T617     | <i>Paludibacter propionisigenes</i> (strain DSM 17365 / JCM 13257 / WB4)                            | 3 | 30  | 2  |
| 141 | E6LE39     | <i>Enterococcus italicus</i> DSM 15952                                                              | 3 | 5   | 2  |
| 142 | E6U4C4     | <i>Ethanoligenens harbinense</i> (strain DSM 18485 / JCM 12961 / CGMCC 1,5033 / YUAN-3)             | 1 | 148 | 1  |
| 143 | E6U8W2     | <i>Ethanoligenens harbinense</i> (strain DSM 18485 / JCM 12961 / CGMCC 1,5033 / YUAN-3)             | 2 | 43  | 1  |
| 144 | F0SVD2     | <i>Syntrophobotulus glycolicus</i> (strain DSM 8271 / FIGlyR)                                       | 2 | 6   | 1  |
| 145 | F0T2U0     | <i>Syntrophobotulus glycolicus</i> (strain DSM 8271 / FIGlyR)                                       | 2 | 91  | 1  |
| 146 | F4A0U0     | <i>Mahella australiensis</i> (strain DSM 15567 / CIP 107919 / 50-1 BON)                             | 1 | 6   | 1  |
| 147 | F5RMP2     | <i>Centipeda periodontii</i> DSM 2778                                                               | 3 | 27  | 1  |
| 148 | F6B909     | <i>Desulfotomaculum carboxydvorans</i> (strain DSM 14880 / VKM B-2319 / CO-1-SRB)                   | 4 | 17  | 1  |
| 149 | F6DR13     | <i>Desulfotomaculum ruminis</i> (strain ATCC 23193 / DSM 2154 / NCIB 8452 / DL)                     | 3 | 23  | 2  |
| 150 | F7NJW4     | <i>Acetonema longum</i> DSM 6540                                                                    | 3 | 6   | 2  |

|     |            |                                                                                                                   |    |      |    |
|-----|------------|-------------------------------------------------------------------------------------------------------------------|----|------|----|
| 151 | A0A0A1DXL6 | <i>Streptococcus salivarius</i> (strain JIM8777)                                                                  | 3  | 5    | 1  |
| 152 | G4KWG9     | <i>Oscillibacter valericigenes</i> (strain DSM 18026 / NBRC 101213 / Sjm18-20)                                    | 3  | 5    | 1  |
| 153 | H6LE04     | <i>Acetobacterium woodii</i> (strain ATCC 29683 / DSM 1030 / JCM 2381 / KCTC 1655)                                | 3  | 51   | 1  |
| 154 | H6LE05     | <i>Acetobacterium woodii</i> (strain ATCC 29683 / DSM 1030 / JCM 2381 / KCTC 1655)                                | 0  | 7    | 1  |
| 155 | Q3ILQ8     | <i>Pseudoalteromonas haloplanktis</i> (strain TAC 125)                                                            | 3  | 20   | 1  |
| 156 | Q5WHF4     | <i>Bacillus clausii</i> (strain KSM-K16)                                                                          | 3  | 20   | 2  |
| 157 | Q65H59     | <i>Bacillus licheniformis</i> (strain DSM 13 / ATCC 14580)                                                        | 3  | 9    | 2  |
| 158 | Q6ALS3     | <i>Desulfotalea psychrophila</i> (strain LSV54 / DSM 12343)                                                       | 3  | 5    | 1  |
| 159 | Q89ZF2     | <i>Bacteroides thetaiotaomicron</i> (strain ATCC 29148 / DSM 2079 / NCTC 10582 / E50 / VPI-5482)                  | 3  | 54   | 10 |
| 160 | Q8NTC4     | <i>Corynebacterium glutamicum</i>                                                                                 | 2  | 9    | 1  |
| 161 | A4A8W3     | <i>Congregibacter litoralis</i> KT71                                                                              | 27 | 25   | 3  |
| 162 | A7NMT7     | <i>Roseiflexus castenholzii</i> (strain DSM 13941 / HLO8)                                                         | 41 | 58   | 2  |
| 163 | B0TAF2     | <i>Heliobacterium modesticaldum</i> (strain ATCC 51547 / Ice1)                                                    | 28 | 54   | 2  |
| 164 | B5Y7V3     | <i>Coprothermobacter proteolyticus</i> (strain ATCC 35245 / DSM 5265 / BT)                                        | 15 | 6    | 2  |
| 165 | B8HFF3     | <i>Arthrobacter chlorophenolicus</i> (strain A6 / ATCC 700700 / DSM 12829 / JCM 12360)                            | 38 | 267  | 7  |
| 166 | C0CZB7     | <i>Clostridium asparagiforme</i> DSM 15981                                                                        | 11 | 4    | 2  |
| 167 | C0D4T2     | <i>Clostridium asparagiforme</i> DSM 15981                                                                        | 36 | 42   | 3  |
| 168 | C4FBU4     | <i>Collinsella intestinalis</i> DSM 13280                                                                         | 27 | 8    | 2  |
| 169 | C7LX90     | <i>Desulfomicrobium baculatum</i> (strain DSM 4028 / VKM B-1378)                                                  | 27 | 58   | 2  |
| 170 | C7PZL3     | <i>Catenulispora acidiphila</i> (strain DSM 44928 / NRRL B-24433 / NBRC 102108 / JCM 14897)                       | 5  | 1    | 2  |
| 171 | C8WY41     | <i>Alicyclobacillus acidocaldarius</i> subsp. <i>acidocaldarius</i> (strain ATCC 27009 / DSM 446 / 104-1A)        | 7  | 2    | 2  |
| 172 | C9KLB4     | <i>Mitsuokella multacida</i> DSM 20544                                                                            | 26 | 177  | 2  |
| 173 | D0L2X8     | <i>Gordonia bronchialis</i> (strain ATCC 25592 / DSM 43247 / JCM 3198 / NCTC 10667)                               | 13 | 2    | 2  |
| 174 | D0MHJ1     | <i>Rhodothermus marinus</i> (strain ATCC 43812 / DSM 4252 / R-10)                                                 | 32 | 27   | 3  |
| 175 | D1B7V1     | <i>Thermanaerovibrio acidaminovorans</i> (strain ATCC 49978 / DSM 6589 / Su883)                                   | 6  | 34   | 2  |
| 176 | D1PP71     | <i>Subdoligranulum variabile</i> DSM 15176                                                                        | 44 | 43   | 4  |
| 177 | D1Z232     | <i>Methanocella paludicola</i> (strain DSM 17711 / JCM 13418 / NBRC 101707 / SANA E)                              | 15 | 76   | 2  |
| 178 | D7BBI7     | <i>Meiothermus silvanus</i> (strain ATCC 700542 / DSM 9946 / VI-R2)                                               | 29 | 28   | 1  |
| 179 | D7BDI0     | <i>Meiothermus silvanus</i> (strain ATCC 700542 / DSM 9946 / VI-R2)                                               | 24 | 39   | 2  |
| 180 | D9Q354     | <i>Acidilobus saccharovorans</i> (strain DSM 16705 / VKM B-2471 / 345-15)                                         | 6  | 1    | 2  |
| 181 | E0RP49     | <i>Spirochaeta thermophila</i> (strain ATCC 49972 / DSM 6192 / RI 19,B1)                                          | 7  | 10   | 2  |
| 182 | E1QXS9     | <i>Olsenella uli</i> (strain ATCC 49627 / DSM 7084 / CIP 109912 / JCM 12494 / VPI D76D-27C)                       | 29 | 75   | 2  |
| 183 | E1QYT1     | <i>Olsenella uli</i> (strain ATCC 49627 / DSM 7084 / CIP 109912 / JCM 12494 / VPI D76D-27C)                       | 34 | 1184 | 15 |
| 184 | E1V588     | <i>Halomonas elongata</i> (strain ATCC 33173 / DSM 2581 / NBRC 15536 / NCIMB 2198 / 1H9)                          | 41 | 205  | 2  |
| 185 | E3D079     | <i>Aminomonas paucivorans</i> DSM 12260                                                                           | 14 | 99   | 1  |
| 186 | E4NPT1     | <i>Halogeometricum borinquense</i> (strain ATCC 700274 / DSM 11551 / JCM 10706 / PR3)                             | 5  | 3    | 1  |
| 187 | F7X6C2     | <i>Sinorhizobium meliloti</i> (strain SM11)                                                                       | 4  | 202  | 3  |
| 188 | L0D9M4     | <i>Singulisphaera acidiphila</i> DSM 18658                                                                        | 34 | 19   | 2  |
| 189 | H1P040     | <i>Holophaga foetida</i> DSM 6591                                                                                 | 20 | 9    | 2  |
| 190 | I0I7R3     | <i>Caldiilinea aerophila</i> (strain DSM 14535 / JCM 11387 / NBRC 104270 / STL-6-O1)                              | 27 | 168  | 3  |
| 191 | Q2KDR9     | <i>Rhizobium etli</i> (strain CFN 42 / ATCC 51251)                                                                | 29 | 138  | 3  |
| 192 | Q2NW06     | <i>Sodalis glossinidius</i> (strain morsitans)                                                                    | 11 | 8    | 2  |
| 193 | Q2RRZ2     | <i>Rhodospirillum rubrum</i> (strain ATCC 11170 / NCIB 8255)                                                      | 8  | 4    | 2  |
| 194 | Q6A655     | <i>Propionibacterium acnes</i> (strain KPA171202 / DSM 16379)                                                     | 30 | 8    | 2  |
| 195 | Q7NRS9     | <i>Chromobacterium violaceum</i> (strain ATCC 12472 / DSM 30191 / JCM 1249 / NBRC 12614 / NCIMB 9131 / NCTC 9757) | 37 | 149  | 3  |
| 196 | Q8FSJ0     | <i>Corynebacterium efficiens</i> (strain DSM 44549 / YS-314 / AJ 12310 / JCM 11189 / NBRC 100395)                 | 23 | 45   | 2  |
| 197 | Q8UJ09     | <i>Agrobacterium tumefaciens</i> (strain C58 / ATCC 33970)                                                        | 25 | 31   | 2  |
| 198 | A1T399     | <i>Mycobacterium vanbaalenii</i> (strain DSM 7251 / PYR-1)                                                        | 6  | 2    | 3  |
| 199 | B0RDJ3     | <i>Clavibacter michiganensis</i> subsp. <i>sepedonicus</i> (strain ATCC 33113 / JCM 9667)                         | 19 | 2    | 1  |
| 200 | B2GG36     | <i>Kocuria rhizophila</i> (strain ATCC 9341 / DSM 348 / NBRC 103217 / DC2201)                                     | 19 | 4    | 1  |

## References

- 1 V. Helaine, R. Mahdi, G. V. S. Babu, V. de Berardinis, R. Wohlgemuth, M. Lemaire and C. Guerard-Helaine, *Adv. Synth. Catal.*, 2015, **357**, 1703–1708.
- 2 D. Gauss, B. Schoenenberger and R. Wohlgemuth, *Carb. Res.*, 2014, **389**, 18–24.
- 3 C. Vergne-Vaxelaire, F. Bordier, A. Fossey, M. Besnard-Gonnet, A. Debard, A. Mariage, V. Pellouin, A. Perret, J.-L. Petit, M. Stam, M. Salanoubat, J. Weissenbach, V. De Berardinis and A. Zaparucha, *Adv. Synth. Catal.*, 2013, **355**, 1763–1779.
- 4 A. L. Valino, M. A. Palazzolo, A. M. Iribarren and E. Lewkowicz, *Appl. Biochem. Biotechnol.*, 2012, **166**, 300–308.
- 5 C. Guerard-Helaine, V. de Berardinis, M. Besnard-Gonnet, E. Darii, M. Debacker, A. Debard, C. Fernandes, V. Helaine, A. Mariage, V. Pellouin, A. Perret, J.-L. Petit, M. Sancelme, M. Lemaire and M. Salanoubat, *ChemCatChem*, 2015, **7**, 1871–1879.
- 6 R. Roldan, I. Sanchez-Moreno, T. Scheidt, V. Helaine, M. Lemaire, T. Parella, P. Clapes, W.-D. Fessner and C. Guerard-Helaine, *Chem.-Eur. J.*, 2017, **23**, 5005–5009.
- 7 O. Eyrisch, G. Sinerius and W.-D. Fessner, *Carb. Res.*, 1993, **238**, 287–306.
- 8 C. Fernández-García, N. M. Grefenstette and M. W. Powner, *Chem. Commun.*, 2017, **53**, 4919–4921.
